# Supplementary material for: Longitudinal Blood DNA Methylation Changes During Weight-Loss Intervention and Dementia Progression Risk
Source: Research Square preprint supplement (doi:10.21203/rs.3.rs-10029889/v1), 2026-06-17
Supplement: Supplementary file 1 [file 7b576bca642abc571abd5786.xlsx]

## Sheet: S1
	Supplementary Table 1 Quality control (QC) information on pre-processing of DNA methylation samples from CENTRAL clinical trial.
	Number of probes or Samples at each QC step
		Diet only	Diet + Physical Activity
	Probes QC
	(a) total number of probes before pre-processing	866091	866091
	(b) remove probes on chrM or with missing annotation	865814	865814
	(c) remove probes that don't start with “cg”	862882	862882
	(d) remove probes on X and Y chromosomes	843341	843341
	(e) remove cross-hybridizing probes and probes near SNP	776769	776769
	Samples QC
	(a) total number of samples	120	120
	(b) remove samples with predicted sex differ from recorded sex status	120	120
	(c) remove samples with bisulfite conversion rate < 85%	120	119
	(d) remove samples belonging to batches with <5 samples	119	119
	(e) remove samples with >5% of missing values across all probes	119	119
	(f) remove samples >3 standard deviations from mean of PC1 or PC2	114	116
	(g) select samples from subjects with data at both time points	110	114
	(h) remove female samples	94	112

## Sheet: S2
	Supplementary Table 2 Quality control (QC) information on pre-processing of DNA methylation data from ADNI cohort.
	Number of probes or Samples at each QC step
		ADNI
	Probes QC
	(a) total number of probes before pre-processing	866836
	(b) remove probes on chrM or with missing annotation	865814
	(c) remove probes that don't start with “cg”	864882
	(d) remove probes on X and Y chromosomes	843341
	(e) remove cross-hybridizing probes and probes near SNP	776769
	Samples QC
	(a) total number of samples	399
	(b) remove samples with predicted sex differ from recorded sex status	398
	(c) remove samples with bisulfite conversion rate < 85%	395
	(d) remove samples belonging to batches with <5 samples	395
	(e) remove duplicate samples by choosing the sample with higher bisulfite conversion rate	352
	(f) remove samples with >5% of missing values across all probes	352
	(g) remove samples >3 standard deviations from mean of PC1 or PC2	347
	(h) remove samples from subjects without repeated measures	344
	(i) keep samples from subjects who are clinically stable across their first two DNAm visits (CN-CN, or MCI-MCI)	234

## Sheet: S3
	Supplementary Table 3 Sample characteristics of ADNI participants included in the analysis. Abbreviations: ADNI, Alzheimer’s Disease Neuroimaging Initiative; CN, cognitively normal; MCI, mild cognitive impairment; SD, standard deviation.
	Characteristics	All	CN	MCI
		(n = 117)	(n = 52)	(n = 65)
	Age, av. (sd)	75.70 (7.44)	78.48 (6.39)	73.48 (7.52)
	Sex, n (%)
	Female	58 (49.57)	28 (53.85)	30 (46.15)
	Male	59 (50.43)	24 (46.15)	35 (53.85)
	APOE ε4 carrier, n (%)	43 (36.75)	18 (34.62)	25 (38.46)
	Education in years, mean (SD)	16.32 (2.90)	16.31 (3.11)	16.32 (2.75)
	Smoking history, n (%)
	Yes	51 (43.59)	24 (46.15)	27 (41.54)
	Follow up visits, av. (sd)	3.63 (2.15)	3.54 (1.95)	3.71 (2.31)
	Follow up years, av. (sd)	4.76 (2.98)	5.6 (2.95)	4.09 (2.85)

## Sheet: S4
	Supplementary Table 4. Significant CpGs associated with DNA methylation changes during the diet-only weight-loss intervention. Shown are CpG sites that changed significantly from baseline to 18 months in the diet-only intervention analysis at a false discovery rate (FDR) < 0.05. For each CpG, the table provides chromosome and genomic position, GREAT-based gene annotation, UCSC RefGene annotation,…
	CpG	Chr	Position	GREAT_annotation	UCSC_RefGene_Name	UCSC_RefGene_Group	Relation_to_Island	estimate	stdErr	pValue	FDR
	cg26210521	chr4	9893892	DRD5 (+112260);SLC2A9 (+127590)	SLC2A9;SLC2A9	Body;Body		0.286147	0.0378394	3.96484e-14	3.07977e-08
	cg22598233	chr19	633656	POLRMT (-61)	POLRMT	TSS200	Island	-0.22137	0.03449	1.37728e-10	5.34913e-05
	cg15869128	chr19	49513150	FCGRT (+873)	FCGRT;FCGRT	5'UTR;TSS200	N_Shore	-0.250484	0.0426155	4.1585e-09	0.00107673
	cg23184039	chr5	177950830	PROP1 (+45411);B4GALT7 (+350732)				0.154111	0.0270788	1.26126e-08	0.00244928
	cg15345626	chr4	189590005	FRG1 (-350783)				0.139728	0.0249161	2.04746e-08	0.00318081
	cg20396870	chr20	15039742	FLRT3 (-702136)	MACROD2	Body		0.162785	0.0299398	5.41632e-08	0.00684638
	cg12724894	chr1	95060172	DIP2C (+19449);ZMYND11 (+535734)	DIP2C	Body	S_Shelf	0.121691	0.0225154	6.48804e-08	0.00684638
	cg23817347	chr20	50510270	PTPN1 (-83)	PTPN1	TSS200	Island	-0.134541	0.0250602	7.93012e-08	0.00684638
	cg03629778	chr7	130051484	ZC3HC1 (-35)	ZC3HC1;ZC3HC1;ZC3HC1	TSS200;TSS200;TSS200	Island	-0.139772	0.0261256	8.79546e-08	0.00684638
	cg24440827	chr11	18456587	LDHAL6A (+705)	LDHAL6A;LDHAL6A;LDHAL6A	1stExon;5'UTR;5'UTR	S_Shore	0.347814	0.0650165	8.81392e-08	0.00684638
	cg05894355	chr1	50108563	ELAVL4 (+2273);DMRTA2 (+314936)	ELAVL4;ELAVL4;ELAVL4;ELAVL4;ELAVL4;ELAVL4	TSS1500;TSS1500;TSS1500;Body;Body;Body		0.134237	0.0256751	1.71083e-07	0.0117571
	cg20117214	chr3	181549899	DNAJC19 (-560128);SOX2 (-162034)	SOX2-OT;SOX2-OT;SOX2-OT	Body;Body;Body		0.144854	0.0277647	1.81631e-07	0.0117571
	cg03440414	chr2	10961465	C2orf50 (-171587);KCNF1 (+49530)			S_Shore	0.24136	0.046527	2.13119e-07	0.0127341
	cg23705082	chr22	46897365	TBC1D22A (+134745)	TBC1D22A;TBC1D22A;TBC1D22A;TBC1D22A;TBC1D22A	Body;Body;Body;Body;Body		0.181548	0.0351608	2.42553e-07	0.0130278
	cg08119153	chr14	78446957	NRXN3 (+43209)	NRXN3;NRXN3	5'UTR;Body		0.154865	0.0300732	2.61028e-07	0.0130278
	cg01108434	chr8	81105175	ZNF704 (-230396);PAG1 (+6892)	PAG1	5'UTR		0.304336	0.0591585	2.68349e-07	0.0130278
	cg02567981	chr12	49707570	FMNL3 (-158)	FMNL3;FMNL3	TSS200;TSS200	Island	-0.264527	0.0518587	3.38007e-07	0.0154443
	cg14640762	chr2	64793483	SLC1A4 (-195917);SERTAD2 (-139572)				0.303875	0.06	4.09294e-07	0.0167668
	cg18487609	chr19	18281743	JUND (-123)	JUND	TSS200	Island	-0.171318	0.0338291	4.1012e-07	0.0167668
	cg16085056	chr5	100046259	FAM174A (-489045)				0.210514	0.0416569	4.33718e-07	0.0168449
	cg15867944	chr20	57269779	BMP7 (-3153)			S_Shelf	0.0942289	0.0188378	5.67023e-07	0.0209736
	cg07221855	chr4	185468310	CCDC110 (+3448);C4orf47 (+38922)	CCDC110;CCDC110	Body;Body	N_Shelf	0.305569	0.0615273	6.82066e-07	0.0240822
	cg25876882	chr15	24676636	SNRPN (-147010);NPAP1 (+1244)	C15orf2	1stExon	S_Shore	0.213169	0.0431541	7.82325e-07	0.0264211
	cg01031251	chr1	26528931	RPS6KA1 (-16920);HMGN2 (+56414)	RPS6KA1	TSS1500	N_Shore	0.129999	0.0263807	8.31556e-07	0.0269136
	cg25290779	chr15	63594747	FBXL22 (-2605)				0.242414	0.0493324	8.92856e-07	0.0277417
	cg11708963	chr19	4639497	TNFAIP8L1 (-519)	TNFAIP8L1;TNFAIP8L1	TSS1500;TSS200	Island	-0.212614	0.0434376	9.84541e-07	0.0287167
	cg07393414	chr8	123274505	ZHX1 (-12)	ZHX1;ZHX1	TSS200;TSS200	Island	-0.228808	0.0467719	9.98174e-07	0.0287167
	cg19710238	chr2	382236	FAM150B (-93942);TMEM18 (+295202)				0.117581	0.0241883	1.16758e-06	0.0313541
	cg17416165	chr5	100046435	FAM174A (-488869)				0.138709	0.0285376	1.17058e-06	0.0313541
	cg27469719	chr7	73719758	STX1A (-102)	STX1A;STX1A	TSS200;TSS200	Island	-0.269581	0.0555632	1.22356e-06	0.0316808
	cg26270411	chr20	44885685	YWHAB (-25)	YWHAB;YWHAB	TSS200;TSS200	N_Shore	-0.143649	0.0296965	1.31667e-06	0.0329919
	cg13315471	chr2	27035625	AGBL5 (-16055);TMEM214 (+2673)	TMEM214;TMEM214	Body;Body	S_Shelf	0.149575	0.0309677	1.36519e-06	0.0331386
	cg19109762	chr2	238967798	TWIST2 (+132823);HDAC4 (+433148)			S_Shore	0.127861	0.0265552	1.47253e-06	0.0336632
	cg10509965	chr9	133100563	RALGDS (+20612);CEL (+38587)	RALGDS;RALGDS;RALGDS;RALGDS;RALGDS	Body;Body;Body;Body;Body		0.124512	0.0258751	1.49388e-06	0.0336632
	cg00188704	chr7	27101177	HOXA1 (-5205);HOXA2 (+1633)	HOXA2	Body	N_Shelf	0.379386	0.0788908	1.51681e-06	0.0336632
	cg10992198	chr19	36061135	OVOL3 (-50067);WDR62 (+6200)	WDR62;WDR62	Body;Body		0.159976	0.0333964	1.66591e-06	0.0337574
	cg15862394	chr14	94936795	GSC (-166572);DICER1 (+221214)				0.369399	0.0771281	1.67268e-06	0.0337574
	cg10703676	chr9	114377743	AKNA (+16661);ORM2 (+47876)	AKNA	Body		0.104567	0.0218487	1.70174e-06	0.0337574
	cg07999939	chr11	48141563	OR4B1 (-75228);PTPRJ (+161004)	PTPRJ	Body		0.271191	0.0567144	1.73821e-06	0.0337574
	cg08635130	chr1	32964848	RNF19B (-165)	RNF19B;RNF19B	TSS200;TSS200	Island	-0.2095	0.0438131	1.73835e-06	0.0337574
	cg26528623	chr10	95291344	PDLIM1 (-322)	PDLIM1	TSS200	Island	-0.224285	0.0469738	1.79981e-06	0.0340985
	cg10690916	chr1	226567250	C1orf95 (+18452);ITPKB (+171912)	C1orf95	Body		0.164049	0.034478	1.95453e-06	0.036148
	cg15857051	chr14	68632398	ZFP36L1 (+160841);RAD51B (+812592)			S_Shelf	0.231914	0.0490572	2.27384e-06	0.0410755
	cg18845984	chr7	149239640	ZNF212 (-10)	ZNF212	TSS200	Island	-0.167082	0.0353935	2.35026e-06	0.041491
	cg13785011	chr12	74664145	ATXN7L3B (+126376);KCNC2 (+545722)				-0.134698	0.0286156	2.51217e-06	0.0433639
	cg07531550	chr4	189731440	FRG1 (-209348)				0.106619	0.0226997	2.64121e-06	0.0446003
	cg24505802	chr12	119870677	CIT (+6613);PRKAB1 (+202925)	CIT;CIT	Body;Body		0.109013	0.023244	2.73257e-06	0.0451612
	cg26766798	chr16	2196352	CASKIN1 (+172)	CASKIN1	1stExon	Island	-0.218306	0.0466502	2.87367e-06	0.0460035
	cg20395881	chr10	1717020	ADARB2 (+20455);WDR37 (+663738)	ADARB2	Body		0.150373	0.0321472	2.90198e-06	0.0460035
	cg20422477	chr7	132079407	PODXL (-522802);PLXNA4 (+497893)				0.133831	0.0286834	3.07443e-06	0.0473881
	cg05472536	chr17	75691396	ITGB4 (-30039);RECQL5 (-24209)	SAP30BP;SAP30BP;SAP30BP;SAP30BP;SAP30BP	Body;Body;Body;Body;Body		0.153764	0.0329731	3.11134e-06	0.0473881

## Sheet: S5
	Supplementary Table 5. Significant CpGs associated with DNA methylation changes during the diet + physical activity weight-loss intervention. Shown are CpG sites that changed significantly from baseline to 18 months in the diet plus physical activity intervention analysis at a false discovery rate (FDR) < 0.05. For each CpG, the table provides chromosome and genomic position, GREAT-based gene ann…
	CpG	Chr	Position	GREAT_annotation	UCSC_RefGene_Name	UCSC_RefGene_Group	Relation_to_Island	estimate	stdErr	pValue	FDR
	cg10992198	chr19	36061135	OVOL3 (-50067);WDR62 (+6200)	WDR62;WDR62	Body;Body		0.144565	0.0219068	4.13747e-11	3.21386e-05
	cg13421331	chr17	67697287	NOL11 (-20545);PITPNC1 (+319134)				0.140441	0.0216497	8.75643e-11	3.40086e-05
	cg14953636	chr12	2410740	FKBP4 (-384212);CACNA1C (+357179)	CACNA1C;CACNA1C;CACNA1C;CACNA1C;CACNA1C;CACNA1C;CACNA1C;CACNA1C;CACNA1C;CACNA1C;CACNA1C;CACNA1C;CACNA1C;CACNA1C;CACNA1C;CACNA1C;CACNA1C;CACNA1C;CACNA1C;CACNA1C;CACNA1C;CACNA1C;CACNA1C	Body;Body;Body;Body;Body;Body;Body;Body;Body;Body;Body;Body;Body;Body;Body;Body;Body;Body;Body;Body;Body;Body;Body		0.100495	0.0164558	1.01551e-09	0.000262938
	cg19109762	chr2	238967798	TWIST2 (+132823);HDAC4 (+433148)			S_Shore	0.138889	0.0230021	1.55956e-09	0.000302854
	cg13315471	chr2	27035625	AGBL5 (-16055);TMEM214 (+2673)	TMEM214;TMEM214	Body;Body	S_Shelf	0.167176	0.0279839	2.31494e-09	0.000359635
	cg10509965	chr9	133100563	RALGDS (+20612);CEL (+38587)	RALGDS;RALGDS;RALGDS;RALGDS;RALGDS	Body;Body;Body;Body;Body		0.12582	0.0216169	5.86893e-09	0.000759801
	cg27021153	chr15	62835955	TPM1 (-206729);TLN2 (+274592)	TLN2	Body		0.247818	0.043377	1.10924e-08	0.00123089
	cg00398767	chr5	109701321	MAN2A1 (+11957)	MAN2A1	Body		0.161804	0.0286508	1.62847e-08	0.00158118
	cg09274347	chr14	103133214	EIF5 (-200787);TNFAIP2 (+9755)	TNFAIP2	Body		0.157967	0.0289381	4.79415e-08	0.00398633
	cg15862119	chr5	73150979	TMEM174 (-22215);TMEM171 (+30689)				0.11152	0.0204748	5.13193e-08	0.00398633
	cg05358915	chr12	130728659	RIMBP2 (-210796);STX2 (+110534)				0.0879463	0.0163427	7.39146e-08	0.00521951
	cg04195161	chr17	38457459	ARHGAP23 (+29043);SRCIN1 (+148479)	ARHGAP23;ARHGAP23	1stExon;5'UTR	S_Shelf	0.122302	0.0231866	1.32996e-07	0.00860896
	cg09554443	chr1	167518524	CD247 (+13)	CD247;CD247;CD247;CD247	1stExon;5'UTR;1stExon;5'UTR		0.109899	0.0210087	1.68462e-07	0.00971806
	cg13422535	chr22	46681784	CERK (+56476);GRAMD4 (+61384)			S_Shelf	0.125112	0.0239498	1.75152e-07	0.00971806
	cg17344999	chr11	114259852	RBM7 (-140177);NNMT (+2023)				0.206076	0.0397579	2.18035e-07	0.0104267
	cg07023901	chr2	64905795	SERTAD2 (-251884);SLC1A4 (-83605)	LOC400958	Body		0.112831	0.0218023	2.27656e-07	0.0104267
	cg00779216	chr2	237372082	COL6A3 (+42292);COPS8 (+286772)	COL6A3;COL6A3;COL6A3;COL6A3;COL6A3	Body;Body;Body;Body;Body	Island	0.11889	0.0230002	2.35246e-07	0.0104267
	cg17449416	chr2	232901501	C2orf82 (+31871);NGEF (+111770)	NGEF;NGEF	Body;Body	S_Shore	0.207328	0.040148	2.41617e-07	0.0104267
	cg01277369	chr11	568374	PHRF1 (-8146);RASSF7 (+7324)	MIR210	TSS200	Island	-0.153434	0.0297931	2.60495e-07	0.0106497
	cg02379870	chr8	22553685	PDLIM2 (-25055);SORBS3 (+1992)	SORBS3	5'UTR	S_Shore	0.127931	0.0251477	3.63452e-07	0.0141159
	cg18766056	chr1	38991513	AKIRIN1 (+292)	AKIRIN1;AKIRIN1	1stExon;1stExon	Island	-0.152982	0.0301619	3.93619e-07	0.0145596
	cg16841327	chr22	46070302	WNT7B (-93175);PPARA (-80316)			Island	-0.10484	0.0207974	4.63129e-07	0.016352
	cg08454858	chr7	22589598	IL6 (-136285);STEAP1B (-89102)				-0.490675	0.0981455	5.74884e-07	0.0194153
	cg10690916	chr1	226567250	C1orf95 (+18452);ITPKB (+171912)	C1orf95	Body		0.128481	0.0258123	6.44049e-07	0.0208449
	cg13020754	chr13	33640236	STARD13 (-354483);RFC3 (-177812)	STARD13	5'UTR		0.12305	0.0248783	7.57248e-07	0.0235283
	cg16920991	chr12	100142566	ANKS1B (-158331);ACTR6 (-57520)	UHRF1BP1L;UHRF1BP1L	Body;Body	Island	-0.147915	0.0300707	8.70328e-07	0.0260017
	cg26594908	chr1	18385220	KLHDC7A (-95709);IGSF21 (+277476)				0.115107	0.0234802	9.47263e-07	0.026836
	cg25614450	chr21	32043392	HUNK (+170079);MIS18A (+235674)				0.101262	0.0206734	9.6735e-07	0.026836
	cg06716807	chr2	27409581	PPM1G (+105)	PPM1G;PPM1G;PPM1G	TSS200;5'UTR;1stExon	Island	-0.193625	0.0397594	1.11648e-06	0.0299051
	cg26210521	chr4	9893892	DRD5 (+112260);SLC2A9 (+127590)	SLC2A9;SLC2A9	Body;Body		0.161752	0.0333959	1.27601e-06	0.0324981
	cg07245558	chr1	246723211	SCCPDH (-835)	SCCPDH	TSS1500	N_Shore	0.118752	0.0245345	1.29696e-06	0.0324981
	cg13586170	chr19	3148979	S1PR4 (-29758);GNA15 (+12788)	GNA15;LOC100996351	Body;Body		0.128644	0.0266455	1.37927e-06	0.0334805
	cg14821659	chr1	241602234	CHML (+33695);KMO (+70104)	OPN3	Body		-0.537243	0.111576	1.47166e-06	0.0337834
	cg00047079	chr13	78614839	POU4F1 (-11303);RNF219 (+44339)	RNF219	3'UTR		0.102172	0.0212236	1.47873e-06	0.0337834
	cg21128206	chr9	68795028	FAM122A (+14982);PRKACG (+219094)	PIP5K1B;PIP5K1B	5'UTR;5'UTR		-0.512323	0.106987	1.67911e-06	0.0372652
	cg12488895	chr1	203348784	FMOD (+2704);BTG2 (+43250)	FMOD;FMOD	Body;5'UTR		0.247718	0.0519543	1.86066e-06	0.0401474
	cg25956820	chr1	220957420	HLX (+79065);DUSP10 (+784755)				0.12412	0.0261333	2.03924e-06	0.0406164
	cg01815730	chr10	24275322	KIAA1217 (+66160);ARHGAP21 (+448345)	MIR603;KIAA1217;KIAA1217;KIAA1217;KIAA1217	TSS1500;Body;Body;Body;Body		0.131038	0.027622	2.09553e-06	0.0406164
	cg18549919	chr8	41900462	ANK1 (-3702)			S_Shelf	0.0918939	0.0193854	2.13333e-06	0.0406164
	cg01333423	chr14	69486106	KIAA0247 (-125489);SLC39A9 (+87416)	PLEKHD1	Body	S_Shore	0.255208	0.0538454	2.14096e-06	0.0406164
	cg21917866	chr17	58354131	SUPT4H1 (-1931)	RNF43	3'UTR	S_Shore	0.145484	0.0306969	2.14384e-06	0.0406164
	cg12120973	chr1	1280544	SCNN1D (+110)	SCNN1D;SCNN1D;SCNN1D	5'UTR;1stExon;Body		0.210497	0.0445671	2.3223e-06	0.0429497
	cg06837034	chr4	78171864	ANXA3 (-379654);FRAS1 (+114296)	FRAS1;FRAS1	Body;Body		0.0867623	0.0184015	2.41763e-06	0.043673
	cg23336973	chr12	117407782	NOS1 (-76710);KSR2 (+561200)				0.089693	0.0191294	2.74871e-06	0.0477869
	cg03619182	chr1	53266601	MAGOH (-27993);LRP8 (+61412)	LRP8;LRP8;LRP8;LRP8	Body;Body;Body;Body		0.26113	0.055719	2.77845e-06	0.0477869
	cg09360295	chr17	21335930	KCNJ12 (-40266);MAP2K3 (+51260)				0.0732636	0.0156482	2.84213e-06	0.0477869
	cg12838928	chr16	16018739	ABCC1 (+69164);ABCC6 (+204724)	ABCC1	Body		0.0909418	0.0194387	2.89145e-06	0.0477869
	cg18153499	chr19	46639201	GNG8 (-4518)			Island	-0.130261	0.0278916	3.008e-06	0.0486775
	cg04391789	chr16	49824230	ZNF423 (-1493)	ZNF423;ZNF423	TSS1500;5'UTR		0.194948	0.0418168	3.13243e-06	0.0496566

## Sheet: S6
	Supplementary Table 6. Pathway enrichment analysis of weight-loss-responsive DNA methylation signatures using the methylGSA R package. Analyses were perfromed separately for the diet-only and the diet plus physical exercise intervention groups. Pathways with false discovery rate–adjusted P values (Padj) < 0.05 are shown. For each enriched pathway, the table presents the Reactome pathway ID, pathw…
	ID	Description	Size	pValue	fdr	core enrichment genes
	Diet only
	R-HSA-5693565	Recruitment and ATM-mediated phosphorylation of repair and signaling proteins at DNA double strand breaks	38	5.19165e-05	0.0442931	UBE2I/TP53/EYA3/SUMO1/MAPK8/MDC1
	R-HSA-5693606	DNA Double Strand Break Response	39	5.5284e-05	0.0442931	UBE2I/TP53/EYA3/SUMO1/MAPK8/MDC1
	R-HSA-3899300	SUMOylation of transcription cofactors	44	6.82482e-05	0.0442931	PHC1/UBE2I/PIAS2/COMMD3-BMI1/SUMO1/CASP8AP2/NCOA1/PCGF2/SIN3A/ZNF131
	Diet + physical activity
	R-HSA-163685	Integration of energy metabolism	105	7.43332e-06	0.0142794	CACNA1C/GNA15/ACSL3/GNG3/SLC2A2/ACACA/ADCY1/GNGT1/PLCB1/CACNA1D/RAPGEF4/PPP2R1A/CD36/TALDO1/ITPR3/CACNB3/GNB3
	R-HSA-422356	Regulation of insulin secretion	77	4.29365e-05	0.0412405	CACNA1C/GNA15/ACSL3/GNG3/SLC2A2/GNGT1/PLCB1/CACNA1D/RAPGEF4/CD36/ITPR3/CACNB3/GNB3
	R-HSA-9664565	Signaling by ERBB2 KD Mutants	24	0.000132636	0.0453692	EGFR/PIK3CA/NRG3/EREG
	R-HSA-68875	Mitotic Prophase	76	0.00013717	0.0453692	NUP37/RAB2A/RAE1/POM121/PPP2R1A/CTDNEP1/NUP160/NUP35/CCNB1/RAB1A/NUP107/AAAS/SMC2/MAPK1
	R-HSA-1433557	Signaling by SCF-KIT	41	0.000141705	0.0453692	YES1/PIK3CA/SOCS6/CHEK1/STAT5B/CMA1
	R-HSA-70171	Glycolysis	68	0.000177981	0.048843	ENO3/NUP37/PKM/RAE1/POM121/GCK/PPP2R1A/NUP160/NUP35/NUP107/AAAS

## Sheet: S7
	Supplementary Table 7 Overlap between diet-only weight loss-associated DNAm signals in CENTRAL and prior cardiometabolic and lifestyle EWAS findings from the EWAS Catalog. This table lists CpG–trait overlaps between DNAm signals associated with the diet-only weight loss intervention in CENTRAL and previously reported CpG–trait associations from whole-blood EWAS studies curated in the EWAS Catalog…
		Annotation				Analysis of CENTRAL dataset (diet only)					Description of the Traits in EWAS catalog				DNAm vs. trait associations from EWAS catalog (PMID: 35592546)
	CpG	chr	position	GREAT_annotation	Relation_to_Island	Sources	estimate	std_error	pvalue	fdr	trait	Biological Identity	Expected Change in weight loss intervention	Relevance to Weight Loss Intervention	beta_ewas	std_error_ewas	pvalue_ewas	outcome	covariates	tissue	ethnicity	sex	age	author	date	PMID / doi
	cg20117214	chr3	181549899	DNAJC19 (-560128);SOX2 (-162034)		Individual CpG	0.144854	0.0277647	1.81631e-07	0.0117571	A0A0G2JMB2	Immunoglobulin heavy constant alpha 2 (IgA2)	Modulated	Reflects shifts in gut microbiome composition and healing of the mucosal barrier (reduced gut permeability).	-0.041795	0.00926996	6.57489e-06	DNA methylation	Age,Sex,Cell composition (reference based),Body mass index, Smoking	whole blood	European	Both	Adults (18-65 years)	Josephine Robertson	2025-12-08	41361833
	cg07377662	chr17	83079322	METRNL (-368)	Island	CpG in DMR	-0.172056	0.0577821	0.00290447	0.551996	age				-0.00013	1.2e-05	0	DNA methylation	sex,gestational age,cohort,cell composition (reference based),batch effects	Whole blood	European	Both	Children	Mulder RH	25/01/2021	33450751
	cg08635130	chr1	32964848	RNF19B (-165)	Island	Individual CpG	-0.2095	0.0438131	1.73835e-06	0.0337574	age				-5.5e-05	9.5e-06	7.7e-09	DNA methylation	sex,gestational age,cohort,cell composition (reference based),batch effects	Whole blood	European	Both	Children	Mulder RH	25/01/2021	33450751
	cg15112442	chr5	100046439	FAM174A (-488865)		CpG in DMR	0.0289585	0.0456488	0.525835	0.980816	age				-0.0014	0.00017	0	DNA methylation	sex,gestational age,cohort,cell composition (reference based),batch effects	Whole blood	European	Both	Children	Mulder RH	25/01/2021	33450751
	cg15867944	chr20	57269779	BMP7 (-3153)	S_Shelf	Individual CpG	0.0942289	0.0188378	5.67023e-07	0.0209736	age				0.0018		4.5e-09	DNA methylation	sex,gestational age,cohort,cell composition (reference based),batch effects	Whole blood	European	Both	Children	Mulder RH	25/01/2021	33450751
	cg16085056	chr5	100046259	FAM174A (-489045)		DMR and Individual CpG	0.210514	0.0416569	4.33718e-07	0.0168449	age				-0.0011	0.00016	6e-11	DNA methylation	sex,gestational age,cohort,cell composition (reference based),batch effects	Whole blood	European	Both	Children	Mulder RH	25/01/2021	33450751
	cg19710238	chr2	382236	FAM150B (-93942);TMEM18 (+295202)		Individual CpG	0.117581	0.0241883	1.16758e-06	0.0313541	age				0.0048	0.00025	0	DNA methylation	sex,gestational age,cohort,cell composition (reference based),batch effects	Whole blood	European	Both	Children	Mulder RH	25/01/2021	33450751
	cg26766798	chr16	2196352	CASKIN1 (+172)	Island	Individual CpG	-0.218306	0.0466502	2.87367e-06	0.0460035	age				-0.00012	2.3e-05	5e-07	DNA methylation	sex,gestational age,cohort,cell composition (reference based),batch effects	Whole blood	European	Both	Children	Mulder RH	25/01/2021	33450751
	cg08119153	chr14	78446957	NRXN3 (+43209)		Individual CpG	0.154865	0.0300732	2.61028e-07	0.0130278	BMI	Body Mass Index	Decrease	The primary anthropometric measure of intervention success.	-0.119199	0.0294532	5.20918e-05	DNA methylation	Age,Sex,Smoking,Cell composition (reference based),Batch effects	Whole blood	European	Both	Adults	Hannah M. Smith	2025-01-02	39706196
	cg10690916	chr1	226567250	C1orf95 (+18452);ITPKB (+171912)		Individual CpG	0.164049	0.034478	1.95453e-06	0.036148	BMI		Decrease	The primary anthropometric measure of intervention success.	-0.301125	0.052745	1.15459e-08	DNA methylation	Age,Sex,Smoking,Cell composition (reference based),Batch effects	Whole blood	European	Both	Adults	Hannah M. Smith	2025-01-02	39706196
	cg20117214	chr3	181549899	DNAJC19 (-560128);SOX2 (-162034)		Individual CpG	0.144854	0.0277647	1.81631e-07	0.0117571	BMI		Decrease	The primary anthropometric measure of intervention success.	-0.834211	0.0548257	6.03731e-52	DNA methylation	Age,Sex,Smoking,Cell composition (reference based),Batch effects	Whole blood	European	Both	Adults	Hannah M. Smith	2025-01-02	39706196
	cg24505802	chr12	119870677	CIT (+6613);PRKAB1 (+202925)		Individual CpG	0.109013	0.023244	2.73257e-06	0.0451612	BMI		Decrease	The primary anthropometric measure of intervention success.	-0.880777	0.0725404	8.69836e-34	DNA methylation	Age,Sex,Smoking,Cell composition (reference based),Batch effects	Whole blood	European	Both	Adults	Hannah M. Smith	2025-01-02	39706196
	cg07377662	chr17	83079322	METRNL (-368)	Island	CpG in DMR	-0.172056	0.0577821	0.00290447	0.551996	Cholesterol esters in very large VLDL	VLDL Lipids	Decrease	Reflects improved liver lipid processing and reduced circulating triglycerides.	28	6.7	2.8e-05	DNA methylation	Batch effects, cell composition (reference free), ancestry (genomic PCs)	Whole blood	European	Females	Adults	Battram T	2020-08-20	NA
	cg05472536	chr17	75691396	ITGB4 (-30039);RECQL5 (-24209)		Individual CpG	0.153764	0.0329731	3.11134e-06	0.0473881	C-reactive protein (CRP) levels	C-reactive protein	Decrease	A primary indicator that obesity-driven systemic inflammation is resolving.	-3.6	0.262	1.2e-43	C-reactive protein (CRP) levels	Age, Sex, Cell composition (reference based), Batch effects	Whole blood	European	Both	Adults	Robert F. Hillary	2023-11-03	38692281
	cg05472536	chr17	75691396	ITGB4 (-30039);RECQL5 (-24209)		Individual CpG	0.153764	0.0329731	3.11134e-06	0.0473881	C-reactive protein (CRP) levels	C-reactive protein	Decrease	A primary indicator that obesity-driven systemic inflammation is resolving.	-1.9	0.263	1.9e-12	C-reactive protein (CRP) levels	Age, Sex, Smoking, Cell composition (reference based), Batch effects, Ancestry (genomic PCs), Body mass index, Socio-economic position, Education, Alcohol consumption	Whole blood	European	Both	Adults	Robert F. Hillary	2023-11-03	38692281
	cg10690916	chr1	226567250	C1orf95 (+18452);ITPKB (+171912)		Individual CpG	0.164049	0.034478	1.95453e-06	0.036148	C-reactive protein (CRP) levels	C-reactive protein	Decrease	A primary indicator that obesity-driven systemic inflammation is resolving.	-1.4	0.336	5.3e-05	C-reactive protein (CRP) levels	Age, Sex, Cell composition (reference based), Batch effects	Whole blood	European	Both	Adults	Robert F. Hillary	2023-11-03	38692281
	cg20117214	chr3	181549899	DNAJC19 (-560128);SOX2 (-162034)		Individual CpG	0.144854	0.0277647	1.81631e-07	0.0117571	C-reactive protein (CRP) levels	C-reactive protein	Decrease	A primary indicator that obesity-driven systemic inflammation is resolving.	-3.7	0.36	4.4e-24	C-reactive protein (CRP) levels	Age, Sex, Cell composition (reference based), Batch effects	Whole blood	European	Both	Adults	Robert F. Hillary	2023-11-03	38692281
	cg24505802	chr12	119870677	CIT (+6613);PRKAB1 (+202925)		Individual CpG	0.109013	0.023244	2.73257e-06	0.0451612	C-reactive protein (CRP) levels	C-reactive protein	Decrease	A primary indicator that obesity-driven systemic inflammation is resolving.	-6.2	0.405	7.7e-53	C-reactive protein (CRP) levels	Age, Sex, Cell composition (reference based), Batch effects	Whole blood	European	Both	Adults	Robert F. Hillary	2023-11-03	38692281
	cg24505802	chr12	119870677	CIT (+6613);PRKAB1 (+202925)		Individual CpG	0.109013	0.023244	2.73257e-06	0.0451612	C-reactive protein (CRP) levels	C-reactive protein	Decrease	A primary indicator that obesity-driven systemic inflammation is resolving.	-3.8	0.417	2.5e-19	C-reactive protein (CRP) levels	Age, Sex, Smoking, Cell composition (reference based), Batch effects, Ancestry (genomic PCs), Body mass index, Socio-economic position, Education, Alcohol consumption	Whole blood	European	Both	Adults	Robert F. Hillary	2023-11-03	38692281
	cg05472536	chr17	75691396	ITGB4 (-30039);RECQL5 (-24209)		Individual CpG	0.153764	0.0329731	3.11134e-06	0.0473881	HDL cholesterol	High-Density Lipoprotein	Increase	Indicates improved lipid transport and cardiovascular protection.	0.443044	0.0309595	3.35177e-46	DNA methylation	Age,Sex,Smoking,Cell composition (reference based),Batch effects	Whole blood	European	Both	Adults	Hannah M. Smith	2025-01-02	39706196
	cg05472536	chr17	75691396	ITGB4 (-30039);RECQL5 (-24209)		Individual CpG	0.153764	0.0329731	3.11134e-06	0.0473881	Incident Type 2 Diabetes	T2D Risk Status	Decrease (Risk)	Weight loss restores insulin sensitivity, drastically lowering the risk of developing clinical diabetes.	-0.042	0.00659	2.5e-10	DNA methylation	Age, Sex, Cell composition (reference based)	Whole blood	European	Both	Adults (18-65y)	Robert F Hillary	2023-09-06	10.1101/2023.01.10.23284387
	cg10690916	chr1	226567250	C1orf95 (+18452);ITPKB (+171912)		Individual CpG	0.164049	0.034478	1.95453e-06	0.036148	Incident Type 2 Diabetes	T2D Risk Status	Decrease (Risk)	Weight loss restores insulin sensitivity, drastically lowering the risk of developing clinical diabetes.	-0.048	0.01082	1e-05	DNA methylation	Age, Sex, Cell composition (reference based)	Whole blood	European	Both	Adults (18-65y)	Robert F Hillary	2023-09-06	10.1101/2023.01.10.23284387
	cg20117214	chr3	181549899	DNAJC19 (-560128);SOX2 (-162034)		Individual CpG	0.144854	0.0277647	1.81631e-07	0.0117571	Incident Type 2 Diabetes	T2D Risk Status	Decrease (Risk)	Weight loss restores insulin sensitivity, drastically lowering the risk of developing clinical diabetes.	-0.075	0.01135	4.5e-11	DNA methylation	Age, Sex, Cell composition (reference based)	Whole blood	European	Both	Adults (18-65y)	Robert F Hillary	2023-09-06	10.1101/2023.01.10.23284387
	cg10509965	chr9	133100563	RALGDS (+20612);CEL (+38587)		Individual CpG	0.124512	0.0258751	1.49388e-06	0.0336632	ITCH protein levels (SeqId = 12551-3)	E3 ubiquitin-protein ligase Itchy homolog	Modulated / Normalize	Regulates inflammatory pathways and lipid metabolism; its turnover rate shifts as overall metabolic stress and systemic inflammation calm down.	-0.78	0.194	5.7e-05	ITCH protein levels (SeqId = 12551-3)	Age, sex, pQTLs, batch effects, ancestry (genomic PCs), depression, cell composition (reference based), body mass index, smoking	Whole blood	European	Both	Adults (18-65 years)	Gadd DA	31/07/2022	35945220
	cg15869128	chr19	49513150	FCGRT (+873)	N_Shore	Individual CpG	-0.250484	0.0426155	4.1585e-09	0.00107673	Moderate physical activity				-0.114109	0.0287734	8.91e-05	DNA methylation	Age,Smoking,Cell composition (reference based)	Whole blood	European,South Asian	Females	Adults (18-65 years)	Fragoso-Bargas Nicolas	2025-01-22	39844050
	cg08119153	chr14	78446957	NRXN3 (+43209)		Individual CpG	0.154865	0.0300732	2.61028e-07	0.0130278	MPL protein levels (SeqId = 3473-78)	Thrombopoietin receptor (soluble)	Normalize	Tracks the normalization of platelet production pathways, reflecting a reduction in the obesity-driven "hypercoagulable" (clotting) state.	-0.44	0.111	8.6e-05	MPL protein levels (SeqId = 3473-78)	Age, sex, pQTLs, batch effects, ancestry (genomic PCs), depression, cell composition (reference based), body mass index, smoking	Whole blood	European	Both	Adults (18-65 years)	Gadd DA	31/07/2022	35945220
	cg14640762	chr2	64793483	SLC1A4 (-195917);SERTAD2 (-139572)		Individual CpG	0.303875	0.06	4.09294e-07	0.0167668	P02748	Complement component C9	Decrease	Reflects a secondary, general calming of the immune/complement system as systemic inflammation subsides.	0.0491211	0.0082466	2.6355e-09	DNA methylation	Age,Sex	whole blood	European	Both	Adults (18-65 years)	Josephine Robertson	2025-12-08	41361833
	cg15869128	chr19	49513150	FCGRT (+873)	N_Shore	Individual CpG	-0.250484	0.0426155	4.1585e-09	0.00107673	P02748	Complement component C9	Decrease	Reflects a secondary, general calming of the immune/complement system as systemic inflammation subsides.	0.0460716	0.0082478	2.36589e-08	DNA methylation	Age,Sex	whole blood	European	Both	Adults (18-65 years)	Josephine Robertson	2025-12-08	41361833
	cg20117214	chr3	181549899	DNAJC19 (-560128);SOX2 (-162034)		Individual CpG	0.144854	0.0277647	1.81631e-07	0.0117571	P02748	Complement component C9	Decrease	Reflects a secondary, general calming of the immune/complement system as systemic inflammation subsides.	0.0623983	0.00824048	3.88909e-14	DNA methylation	Age,Sex	whole blood	European	Both	Adults (18-65 years)	Josephine Robertson	2025-12-08	41361833
	cg24505802	chr12	119870677	CIT (+6613);PRKAB1 (+202925)		Individual CpG	0.109013	0.023244	2.73257e-06	0.0451612	P02748	Complement component C9	Decrease	Reflects a secondary, general calming of the immune/complement system as systemic inflammation subsides.	-0.150907	0.00816202	1.82464e-75	DNA methylation	Age,Sex	whole blood	European	Both	Adults (18-65 years)	Josephine Robertson	2025-12-08	41361833
	cg24505802	chr12	119870677	CIT (+6613);PRKAB1 (+202925)		Individual CpG	0.109013	0.023244	2.73257e-06	0.0451612	P02748	Complement component C9	Decrease	Reflects a secondary, general calming of the immune/complement system as systemic inflammation subsides.	-0.091498	0.00914469	1.71323e-23	DNA methylation	Age,Sex,Cell composition (reference based)	whole blood	European	Both	Adults (18-65 years)	Josephine Robertson	2025-12-08	41361833
	cg24505802	chr12	119870677	CIT (+6613);PRKAB1 (+202925)		Individual CpG	0.109013	0.023244	2.73257e-06	0.0451612	P02748	Complement component C9	Decrease	Reflects a secondary, general calming of the immune/complement system as systemic inflammation subsides.	-0.0890406	0.00915893	2.84439e-22	DNA methylation	Age,Sex,Cell composition (reference based),Body mass index, Smoking	whole blood	European	Both	Adults (18-65 years)	Josephine Robertson	2025-12-08	41361833
	cg24505802	chr12	119870677	CIT (+6613);PRKAB1 (+202925)		Individual CpG	0.109013	0.023244	2.73257e-06	0.0451612	P02748	Complement component C9	Decrease	Reflects a secondary, general calming of the immune/complement system as systemic inflammation subsides.	-0.106814	0.0105267	4.10895e-24	DNA methylation	Age,Sex,Cell composition (reference based),Body mass index, Smoking,20 DNAm PCs	whole blood	European	Both	Adults (18-65 years)	Josephine Robertson	2025-12-08	41361833
	cg26270411	chr20	44885685	YWHAB (-25)	N_Shore	Individual CpG	-0.143649	0.0296965	1.31667e-06	0.0329919	P02748	Complement component C9	Decrease	Reflects a secondary, general calming of the immune/complement system as systemic inflammation subsides.	0.0373639	0.00825081	5.98668e-06	DNA methylation	Age,Sex	whole blood	European	Both	Adults (18-65 years)	Josephine Robertson	2025-12-08	41361833
	cg10690916	chr1	226567250	C1orf95 (+18452);ITPKB (+171912)		Individual CpG	0.164049	0.034478	1.95453e-06	0.036148	P02750	Leucine-rich alpha-2-glycoprotein (LRG1)	Decrease	A metabolic and inflammatory marker that reliably drops following significant fat loss (e.g., via diet or bariatric surgery).	0.0792376	0.00823061	7.12438e-22	DNA methylation	Age,Sex	whole blood	European	Both	Adults (18-65 years)	Josephine Robertson	2025-12-08	41361833
	cg08119153	chr14	78446957	NRXN3 (+43209)		Individual CpG	0.154865	0.0300732	2.61028e-07	0.0130278	P02775	Platelet basic protein (CXCL7)	Decrease	Normalizes as obesity-related platelet hyperactivity and chemokine dysregulation calm down.	-0.10194	0.00821356	3.41554e-35	DNA methylation	Age,Sex	whole blood	European	Both	Adults (18-65 years)	Josephine Robertson	2025-12-08	41361833
	cg08119153	chr14	78446957	NRXN3 (+43209)		Individual CpG	0.154865	0.0300732	2.61028e-07	0.0130278	P02775	Platelet basic protein (CXCL7)	Decrease	Normalizes as obesity-related platelet hyperactivity and chemokine dysregulation calm down.	-0.108911	0.00833714	8.77945e-39	DNA methylation	Age,Sex,Cell composition (reference based)	whole blood	European	Both	Adults (18-65 years)	Josephine Robertson	2025-12-08	41361833
	cg08119153	chr14	78446957	NRXN3 (+43209)		Individual CpG	0.154865	0.0300732	2.61028e-07	0.0130278	P02775	Platelet basic protein (CXCL7)	Decrease	Normalizes as obesity-related platelet hyperactivity and chemokine dysregulation calm down.	-0.110474	0.00833815	7.72103e-40	DNA methylation	Age,Sex,Cell composition (reference based),Body mass index, Smoking	whole blood	European	Both	Adults (18-65 years)	Josephine Robertson	2025-12-08	41361833
	cg08119153	chr14	78446957	NRXN3 (+43209)		Individual CpG	0.154865	0.0300732	2.61028e-07	0.0130278	P02775	Platelet basic protein (CXCL7)	Decrease	Normalizes as obesity-related platelet hyperactivity and chemokine dysregulation calm down.	-0.110461	0.0101033	1.024e-27	DNA methylation	Age,Sex,Cell composition (reference based),Body mass index, Smoking,20 DNAm PCs	whole blood	European	Both	Adults (18-65 years)	Josephine Robertson	2025-12-08	41361833
	cg15112442	chr5	100046439	FAM174A (-488865)		CpG in DMR	0.0289585	0.0456488	0.525835	0.980816	P02775	Platelet basic protein (CXCL7)	Decrease	Normalizes as obesity-related platelet hyperactivity and chemokine dysregulation calm down.	-0.0505611	0.012913	9.06221e-05	DNA methylation	Age,Sex,Cell composition (reference based),Body mass index, Smoking,20 DNAm PCs	whole blood	European	Both	Adults (18-65 years)	Josephine Robertson	2025-12-08	41361833
	cg00188704	chr7	27101177	HOXA1 (-5205);HOXA2 (+1633)	N_Shelf	Individual CpG	0.379386	0.0788908	1.51681e-06	0.0336632	P02790	Hemopexin	Decrease	Secreted by fat cells; circulating levels fall as adipose tissue volume and associated oxidative stress decrease.	-0.0335719	0.00825192	4.759e-05	DNA methylation	Age,Sex	whole blood	European	Both	Adults (18-65 years)	Josephine Robertson	2025-12-08	41361833
	cg26528623	chr10	95291344	PDLIM1 (-322)	Island	Individual CpG	-0.224285	0.0469738	1.79981e-06	0.0340985	P04114	Apolipoprotein B (ApoB)	Decrease	A crucial marker for cardiovascular risk that closely tracks with reductions in atherogenic LDL/VLDL particles.	0.0620451	0.00824066	5.40466e-14	DNA methylation	Age,Sex	whole blood	European	Both	Adults (18-65 years)	Josephine Robertson	2025-12-08	41361833
	cg20117214	chr3	181549899	DNAJC19 (-560128);SOX2 (-162034)		Individual CpG	0.144854	0.0277647	1.81631e-07	0.0117571	P08603	Complement factor H (CFH)	Decrease	Directly correlated with fat mass; levels drop as adipose tissue shrinks and insulin sensitivity improves.	-0.0817414	0.0092011	7.19703e-19	DNA methylation	Age,Sex,Cell composition (reference based)	whole blood	European	Both	Adults (18-65 years)	Josephine Robertson	2025-12-08	41361833
	cg05472536	chr17	75691396	ITGB4 (-30039);RECQL5 (-24209)		Individual CpG	0.153764	0.0329731	3.11134e-06	0.0473881	P18428	Lipopolysaccharide-binding protein (LBP)	Decrease	Highly responsive to weight loss; indicates healing of the gut barrier and reduced "metabolic endotoxemia."	-0.129919	0.00818659	3.01336e-56	DNA methylation	Age,Sex	whole blood	European	Both	Adults (18-65 years)	Josephine Robertson	2025-12-08	41361833
	cg05472536	chr17	75691396	ITGB4 (-30039);RECQL5 (-24209)		Individual CpG	0.153764	0.0329731	3.11134e-06	0.0473881	P18428	Lipopolysaccharide-binding protein (LBP)	Decrease	Highly responsive to weight loss; indicates healing of the gut barrier and reduced "metabolic endotoxemia."	-0.0982926	0.00884029	1.32384e-28	DNA methylation	Age,Sex,Cell composition (reference based)	whole blood	European	Both	Adults (18-65 years)	Josephine Robertson	2025-12-08	41361833
	cg05472536	chr17	75691396	ITGB4 (-30039);RECQL5 (-24209)		Individual CpG	0.153764	0.0329731	3.11134e-06	0.0473881	P18428	Lipopolysaccharide-binding protein (LBP)	Decrease	Highly responsive to weight loss; indicates healing of the gut barrier and reduced "metabolic endotoxemia."	-0.0786187	0.00872443	2.28351e-19	DNA methylation	Age,Sex,Cell composition (reference based),Body mass index, Smoking	whole blood	European	Both	Adults (18-65 years)	Josephine Robertson	2025-12-08	41361833
	cg05472536	chr17	75691396	ITGB4 (-30039);RECQL5 (-24209)		Individual CpG	0.153764	0.0329731	3.11134e-06	0.0473881	P18428	Lipopolysaccharide-binding protein (LBP)	Decrease	Highly responsive to weight loss; indicates healing of the gut barrier and reduced "metabolic endotoxemia."	-0.0995624	0.0119339	7.89695e-17	DNA methylation	Age,Sex,Cell composition (reference based),Body mass index, Smoking,20 DNAm PCs	whole blood	European	Both	Adults (18-65 years)	Josephine Robertson	2025-12-08	41361833
	cg20117214	chr3	181549899	DNAJC19 (-560128);SOX2 (-162034)		Individual CpG	0.144854	0.0277647	1.81631e-07	0.0117571	PGM2 protein levels (SeqId = 18330-7)	Phosphoglucomutase-2	Modulated	An intracellular enzyme whose levels shift as the body adapts its sugar metabolism, moving away from circulating glucose toward breaking down stored glycogen.	-1.2	0.307	8.5e-05	PGM2 protein levels (SeqId = 18330-7)	Age, sex, pQTLs, batch effects, ancestry (genomic PCs), depression, cell composition (reference based), body mass index, smoking	Whole blood	European	Both	Adults (18-65 years)	Gadd DA	31/07/2022	35945220
	cg08119153	chr14	78446957	NRXN3 (+43209)		Individual CpG	0.154865	0.0300732	2.61028e-07	0.0130278	Total cholesterol	Total Cholesterol	Decrease	A general marker of improved metabolic and cardiovascular health.	0.0980631	0.0236564	3.40896e-05	DNA methylation	Age,Sex,Smoking,Cell composition (reference based)	Whole blood	European	Both	Adults	Hannah M. Smith	2025-01-02	39706196
	In the column "Expected Change in weight loss intervention", modulated: the protein's activity or concentration is being adjusted, tuned, or regulated to a new baseline, rather than simply moving in a strict, one-directional "up" or "down" trajectory for every single person.

## Sheet: S8
	Supplementary Table 8 Overlap between diet plus physical activity weight loss-associated DNAm signals in CENTRAL and prior cardiometabolic, inflammatory, lifestyle, and protein biomarker EWAS findings from the EWAS Catalog. CENTRAL DNAm signals include CpGs identified in the diet plus physical activity analysis, with the source of each CpG indicated in the “Sources” column. For each CpG, the tabl…
		Annotation				Analysis of CENTRAL dataset (diet + physical activity)					Additional traits in external studies associated with significant CpGs responsive to weight loss intervention (diet only)				DNAm vs. trait associations from EWAS catalog (PMID: 35592546)
	CpG	chr	position	GREAT_annotation	Relation_to_Island	Sources	estimate	std_error	pvalue	fdr	trait	Biological Identity	Expected Change in weight loss intervention	Relevance to Weight Loss Intervention	beta_ewas	std_error_ewas	pvalue_ewas	outcome	covariates	tissue	ethnicity	sex	age	author	date	PMID / doi
	cg03619182	chr1	53266601	MAGOH (-27993);LRP8 (+61412)		Individual CpG	0.26113	0.055719	2.77845e-06	0.0477869	A0A0G2JMB2	Immunoglobulin heavy constant alpha 2 (IgA2)	Modulated	Reflects shifts in gut microbiome composition and healing of the mucosal barrier (reduced gut permeability).	0.0327101	0.00825215	7.41062e-05	DNA methylation	Age,Sex	whole blood	European	Both	Adults (18-65 years)	Josephine Robertson	2025-12-08	41361833
	cg05358915	chr12	130728659	RIMBP2 (-210796);STX2 (+110534)		Individual CpG	0.0879463	0.0163427	7.39146e-08	0.00521951	age				-0.003	0.00076	7.8e-05	DNA methylation	sex,gestational age,cohort,cell composition (reference based),batch effects	Whole blood	European	Both	Children	Mulder RH	25/01/2021	33450751
	cg06716807	chr2	27409581	PPM1G (+105)	Island	Individual CpG	-0.193625	0.0397594	1.11648e-06	0.0299051	age				0.00022		1.6e-06	DNA methylation	sex,gestational age,cohort,cell composition (reference based),batch effects	Whole blood	European	Both	Children	Mulder RH	25/01/2021	33450751
	cg06837034	chr4	78171864	ANXA3 (-379654);FRAS1 (+114296)		Individual CpG	0.0867623	0.0184015	2.41763e-06	0.043673	age				-0.001	0.00013	2.2e-16	DNA methylation	sex,gestational age,cohort,cell composition (reference based),batch effects	Whole blood	European	Both	Children	Mulder RH	25/01/2021	33450751
	cg07245558	chr1	246723211	SCCPDH (-835)	N_Shore	Individual CpG	0.118752	0.0245345	1.29696e-06	0.0324981	age				-0.00096	0.00013	3.1e-13	DNA methylation	sex,gestational age,cohort,cell composition (reference based),batch effects	Whole blood	European	Both	Children	Mulder RH	25/01/2021	33450751
	cg09554443	chr1	167518524	CD247 (+13)		Individual CpG	0.109899	0.0210087	1.68462e-07	0.00971806	age				-0.0023	0.0002	0	DNA methylation	sex,gestational age,cohort,cell composition (reference based),batch effects	Whole blood	European	Both	Children	Mulder RH	25/01/2021	33450751
	cg18549919	chr8	41900462	ANK1 (-3702)	S_Shelf	Individual CpG	0.0918939	0.0193854	2.13333e-06	0.0406164	age				-0.005	0.0009	3.4e-08	DNA methylation	sex,gestational age,cohort,cell composition (reference based),batch effects	Whole blood	European	Both	Children	Mulder RH	25/01/2021	33450751
	cg09554443	chr1	167518524	CD247 (+13)		Individual CpG	0.109899	0.0210087	1.68462e-07	0.00971806	BMI	Body Mass Index	Decrease	The primary anthropometric measure of weight loss success	-0.448937	0.0336048	1.65924e-40	DNA methylation	Age,Sex,Smoking,Cell composition (reference based),Batch effects	Whole blood	European	Both	Adults	Hannah M. Smith	2025-01-02	39706196
	cg10690916	chr1	226567250	C1orf95 (+18452);ITPKB (+171912)		Individual CpG	0.128481	0.0258123	6.44049e-07	0.0208449	BMI	Body Mass Index	Decrease	The primary anthropometric measure of weight loss success; reversing its related epigenetic markers reflects systemic metabolic repair.	-0.301125	0.052745	1.15459e-08	DNA methylation	Age,Sex,Smoking,Cell composition (reference based),Batch effects	Whole blood	European	Both	Adults	Hannah M. Smith	2025-01-02	39706196
	cg18549919	chr8	41900462	ANK1 (-3702)	S_Shelf	Individual CpG	0.0918939	0.0193854	2.13333e-06	0.0406164	BMI	Body Mass Index	Decrease	The primary anthropometric measure of weight loss success; reversing its related epigenetic markers reflects systemic metabolic repair.	-0.393309	0.0744003	1.26272e-07	DNA methylation	Age,Sex,Smoking,Cell composition (reference based),Batch effects	Whole blood	European	Both	Adults	Hannah M. Smith	2025-01-02	39706196
	cg09554443	chr1	167518524	CD247 (+13)		Individual CpG	0.109899	0.0210087	1.68462e-07	0.00971806	Body mass index	Body Mass Index	Decrease	The primary anthropometric measure of weight loss success; reversing its related epigenetic markers reflects systemic metabolic repair.	-	-	8.2e-13	Body mass index	Age, sex, smoking, physical activity index, alcohol consumption, cell counts and technical covariates	Whole blood	European,South Asian	Both	54.5	Wahl S	2017-01-05	28002404
	cg09554443	chr1	167518524	CD247 (+13)		Individual CpG	0.109899	0.0210087	1.68462e-07	0.00971806	body mass index	Body Mass Index	Decrease	The primary anthropometric measure of weight loss success; reversing its related epigenetic markers reflects systemic metabolic repair.			2.5e-08	DNA methylation	age, sex, smoking, cell composition (reference based), batch effects	Whole blood	African	Both	Adults	Sun D	2019-09-12	31510868
	cg03619182	chr1	53266601	MAGOH (-27993);LRP8 (+61412)		Individual CpG	0.26113	0.055719	2.77845e-06	0.0477869	CHGB protein levels (SeqId = 8235-48)	Chromogranin-B	Modulated	Involved in neuroendocrine signaling; adjusts as the autonomic nervous system adapts to diet and metabolic changes.	-1.1	0.275	6.4e-05	CHGB protein levels (SeqId = 8235-48)	Age, sex, pQTLs, batch effects, ancestry (genomic PCs), depression, cell composition (reference based), body mass index, smoking	Whole blood	European	Both	Adults (18-65 years)	Gadd DA	31/07/2022	35945220
	cg09554443	chr1	167518524	CD247 (+13)		Individual CpG	0.109899	0.0210087	1.68462e-07	0.00971806	C-reactive protein (CRP) levels	C-reactive protein	Decrease	A primary indicator that obesity-driven systemic inflammation is resolving.	-1.2	0.244	8.4e-07	C-reactive protein (CRP) levels	Age, Sex, Cell composition (reference based), Batch effects	Whole blood	European	Both	Adults	Robert F. Hillary	2023-11-03	38692281
	cg10690916	chr1	226567250	C1orf95 (+18452);ITPKB (+171912)		Individual CpG	0.128481	0.0258123	6.44049e-07	0.0208449	C-reactive protein (CRP) levels	C-reactive protein	Decrease	A primary indicator that obesity-driven systemic inflammation is resolving.	-1.4	0.336	5.3e-05	C-reactive protein (CRP) levels	Age, Sex, Cell composition (reference based), Batch effects	Whole blood	European	Both	Adults	Robert F. Hillary	2023-11-03	38692281
	cg17344999	chr11	114259852	RBM7 (-140177);NNMT (+2023)		Individual CpG	0.206076	0.0397579	2.18035e-07	0.0104267	C-reactive protein (CRP) levels	C-reactive protein	Decrease	A primary indicator that obesity-driven systemic inflammation is resolving.	1.7	0.434	6.2e-05	C-reactive protein (CRP) levels	Age, Sex, Cell composition (reference based), Batch effects	Whole blood	European	Both	Adults	Robert F. Hillary	2023-11-03	38692281
	cg13020754	chr13	33640236	STARD13 (-354483);RFC3 (-177812)		Individual CpG	0.12305	0.0248783	7.57248e-07	0.0235283	HDL cholesterol	High-Density Lipoprotein	Increase	Indicates improved lipid transport and cardiovascular protection.	0.191067	0.0447834	1.99599e-05	DNA methylation	Age,Sex,Smoking,Cell composition (reference based),Batch effects	Whole blood	European	Both	Adults	Hannah M. Smith	2025-01-02	39706196
	cg10690916	chr1	226567250	C1orf95 (+18452);ITPKB (+171912)		Individual CpG	0.128481	0.0258123	6.44049e-07	0.0208449	Incident Type 2 Diabetes	T2D Risk Status	Decrease (Risk)	Weight loss restores insulin sensitivity, drastically lowering the risk of developing clinical diabetes.	-0.048	0.01082	1e-05	DNA methylation	Age, Sex, Cell composition (reference based)	Whole blood	European	Both	Adults (18-65y)	Robert F Hillary	2023-09-06	10.1101/2023.01.10.23284387
	cg09554443	chr1	167518524	CD247 (+13)		Individual CpG	0.109899	0.0210087	1.68462e-07	0.00971806	fasting insulin / insulin	Metabolic Hormone	Decrease	A crucial early indicator that the intervention is restoring insulin sensitivity and shifting the body from fat-storing to fat-burning.	-0.97	0.21	6.8e-06	DNA methylation	Age, sex, smoking, cell composition (reference based), batch effects	whole blood	European	Both	Adults	Liu J	2013-06-19	31197173
	cg18549919	chr8	41900462	ANK1 (-3702)	S_Shelf	Individual CpG	0.0918939	0.0193854	2.13333e-06	0.0406164					-0.0059	0.0013	1.6e-05	DNA methylation	Batch effects, cell composition (reference free), ancestry (genomic PCs)	Whole blood	European	Females	Adults	Battram T	2020-08-20	NA
	cg10509965	chr9	133100563	RALGDS (+20612);CEL (+38587)		Individual CpG	0.12582	0.0216169	5.86893e-09	0.000759801	ITCH protein levels (SeqId = 12551-3)	E3 ubiquitin-protein ligase Itchy homolog	Modulated / Normalize	Regulates inflammatory pathways and lipid metabolism; its turnover rate shifts as overall metabolic stress and systemic inflammation calm down.	-0.78	0.194	5.7e-05	ITCH protein levels (SeqId = 12551-3)	Age, sex, pQTLs, batch effects, ancestry (genomic PCs), depression, cell composition (reference based), body mass index, smoking	Whole blood	European	Both	Adults (18-65 years)	Gadd DA	31/07/2022	35945220
	cg09554443	chr1	167518524	CD247 (+13)		Individual CpG	0.109899	0.0210087	1.68462e-07	0.00971806	P01024	Complement C3	Decrease	A central immune protein heavily elevated in obesity; its levels and associated epigenetic marks calm down as adipose tissue shrinks.	-0.10133	0.00917068	2.85608e-28	DNA methylation	Age,Sex,Cell composition (reference based)	whole blood	European	Both	Adults (18-65 years)	Josephine Robertson	2025-12-08	41361833
	cg09554443	chr1	167518524	CD247 (+13)		Individual CpG	0.109899	0.0210087	1.68462e-07	0.00971806	P01024	Complement C3	Decrease	A central immune protein heavily elevated in obesity; its levels and associated epigenetic marks calm down as adipose tissue shrinks.	-0.0447738	0.00846181	1.23208e-07	DNA methylation	Age,Sex,Cell composition (reference based),Body mass index, Smoking	whole blood	European	Both	Adults (18-65 years)	Josephine Robertson	2025-12-08	41361833
	cg09554443	chr1	167518524	CD247 (+13)		Individual CpG	0.109899	0.0210087	1.68462e-07	0.00971806	P01024	Complement C3	Decrease	A central immune protein heavily elevated in obesity; its levels and associated epigenetic marks calm down as adipose tissue shrinks.	-0.0579224	0.00977741	3.21055e-09	DNA methylation	Age,Sex,Cell composition (reference based),Body mass index, Smoking,20 DNAm PCs	whole blood	European	Both	Adults (18-65 years)	Josephine Robertson	2025-12-08	41361833
	cg13020754	chr13	33640236	STARD13 (-354483);RFC3 (-177812)		Individual CpG	0.12305	0.0248783	7.57248e-07	0.0235283	P01742	Immunoglobulin heavy variable 1-69 (IGHV1-69)	Modulated	Reflects a systemic immune reset and shifts in B-cell antibody production as the gut microbiome changes and chronic inflammation subsides.	-0.0332353	0.00825201	5.66466e-05	DNA methylation	Age,Sex	whole blood	European	Both	Adults (18-65 years)	Josephine Robertson	2025-12-08	41361833
	cg18766056	chr1	38991513	AKIRIN1 (+292)	Island	Individual CpG	-0.152982	0.0301619	3.93619e-07	0.0145596	P02748	Complement component C9	Decrease	Reflects a secondary, general calming of the immune/complement system as systemic inflammation subsides.	0.0374002	0.00825079	5.8632e-06	DNA methylation	Age,Sex	whole blood	European	Both	Adults (18-65 years)	Josephine Robertson	2025-12-08	41361833
	cg09554443	chr1	167518524	CD247 (+13)		Individual CpG	0.109899	0.0210087	1.68462e-07	0.00971806	P02750	Leucine-rich alpha-2-glycoprotein (LRG1)		A marker of metabolic stress that reliably drops following significant fat loss.	0.0972732	0.00821742	3.50225e-32	DNA methylation	Age,Sex	whole blood	European	Both	Adults (18-65 years)	Josephine Robertson	2025-12-08	41361833
	cg10690916	chr1	226567250	C1orf95 (+18452);ITPKB (+171912)		Individual CpG	0.128481	0.0258123	6.44049e-07	0.0208449	P02750	Leucine-rich alpha-2-glycoprotein (LRG1)		A marker of metabolic stress that reliably drops following significant fat loss.	0.0792376	0.00823061	7.12438e-22	DNA methylation	Age,Sex	whole blood	European	Both	Adults (18-65 years)	Josephine Robertson	2025-12-08	41361833
	cg17344999	chr11	114259852	RBM7 (-140177);NNMT (+2023)		Individual CpG	0.206076	0.0397579	2.18035e-07	0.0104267	P06396	Gelsolin	Modulated	Clears cellular debris; its turnover responds to the tissue remodeling and exercise components of a lifestyle intervention.	-0.0351154	0.00825148	2.09739e-05	DNA methylation	Age,Sex	whole blood	European	Both	Adults (18-65 years)	Josephine Robertson	2025-12-08	41361833
	cg17344999	chr11	114259852	RBM7 (-140177);NNMT (+2023)		Individual CpG	0.206076	0.0397579	2.18035e-07	0.0104267	P06396	Gelsolin	Modulated	Clears cellular debris; its turnover responds to the tissue remodeling and exercise components of a lifestyle intervention.	-0.0326753	0.00819841	6.76463e-05	DNA methylation	Age,Sex,Cell composition (reference based),Body mass index, Smoking	whole blood	European	Both	Adults (18-65 years)	Josephine Robertson	2025-12-08	41361833
	cg26594908	chr1	18385220	KLHDC7A (-95709);IGSF21 (+277476)		Individual CpG	0.115107	0.0234802	9.47263e-07	0.026836	PFN2 protein levels (SeqId = 16923-20)	Profilin-2	Modulated	Regulates cellular structure; reflects shifts in muscle fiber turnover specifically driven by the physical activity component of weight loss.	-0.58	0.148	8.8e-05	PFN2 protein levels (SeqId = 16923-20)	Age, sex, pQTLs, batch effects, ancestry (genomic PCs), depression, cell composition (reference based), body mass index, smoking	Whole blood	European	Both	Adults (18-65 years)	Gadd DA	31/07/2022	35945220
	cg18766056	chr1	38991513	AKIRIN1 (+292)	Island	Individual CpG	-0.152982	0.0301619	3.93619e-07	0.0145596	Q13790	Apolipoprotein F	Modulated	Involved in cholesterol clearance; shifts as the liver adapts to new lipid processing demands during weight loss.	-0.0332516	0.0082037	5.07728e-05	DNA methylation	Age,Sex,Cell composition (reference based),Body mass index, Smoking	whole blood	European	Both	Adults (18-65 years)	Josephine Robertson	2025-12-08	41361833
	cg13586170	chr19	3148979	S1PR4 (-29758);GNA15 (+12788)		Individual CpG	0.128644	0.0266455	1.37927e-06	0.0334805	STK17B protein levels (SeqId = 5249-31)	Serine/threonine-protein kinase 17B (DRAK2)	Modulated	Regulates T-cell activation and pancreatic stress; shifts reflect the "demobilization" of immune cells from fat tissue and improved metabolic balance.	-0.89	0.217	3.8e-05	STK17B protein levels (SeqId = 5249-31)	Age, sex, pQTLs, batch effects, ancestry (genomic PCs), depression, cell composition (reference based), body mass index, smoking	Whole blood	European	Both	Adults (18-65 years)	Gadd DA	31/07/2022	35945220
	cg13422535	chr22	46681784	CERK (+56476);GRAMD4 (+61384)	S_Shelf	Individual CpG	0.125112	0.0239498	1.75152e-07	0.00971806	VHL protein levels (SeqId = 17362-5)	von Hippel-Lindau tumor suppressor	Modulated	The cellular oxygen sensor; adjusts as the body relieves adipose tissue hypoxia (shrinking fat cells) and improves vascular networks through exercise.	-1.08	0.259	3.1e-05	VHL protein levels (SeqId = 17362-5)	Age, sex, pQTLs, batch effects, ancestry (genomic PCs), depression, cell composition (reference based), body mass index, smoking	Whole blood	European	Both	Adults (18-65 years)	Gadd DA	31/07/2022	35945220
	cg09554443	chr1	167518524	CD247 (+13)		Individual CpG	0.109899	0.0210087	1.68462e-07	0.00971806	Waist circumference		decrease		-0.0092	0.0012	1.72e-14	DNA methylation	Age, sex, smoking, study centre, alcohol consumption, education, household income, physical activity, cell counts and technical covariates	Leukocytes	African	Both	56.2	Demerath EW	2015-08-01	25935004

## Sheet: S9
	Supplementary Table 9. Overlap between diet-only weight loss-associated DNAm signals in CENTRAL and dementia-related EWAS findings from the MIAMI-AD database. This table lists CpG–phenotype associations between DNAm signals identified from the diet-only intervention in CENTRAL and previously reported dementia-related EWAS findings curated in the MIAMI-AD database. CENTRAL DNAm signals include ind…
	CpG	Annotations			Analysis of CENTRAL dataset (diet only)					Alzheimer's disease analyses results from previous studies
		chr	position	GREAT_annotation	estimate	stdErr	pValue	Direction	Source	dataset	cohort	phenotype	sex_specific	statistics	direction	statistics_value	pValue	Description	Author	Year	PMID
	cg24440827	chr11	18456587	LDHAL6A (+705)	0.347814	0.0650165	8.81392e-08	+	Individual CpG	ZDH	FHS9 + ADNI	Dementia	No	hazard ratio for dementia risk (meta-analysis)	-	-0.306	0.00022094	Blood DNAm associated with dementia onset	Zhang	2025	40133250
	cg24440827	chr11	18456587	LDHAL6A (+705)	0.347814	0.0650165	8.81392e-08	+	Individual CpG	ZDH	FHS9	Dementia	No	hazard ratio for dementia risk	-	-0.314	0.00033514	Blood DNAm associated with dementia onset	Zhang	2025	40133250
	cg19710238	chr2	382236	FAM150B (-93942);TMEM18 (+295202)	0.117581	0.0241883	1.16758e-06	+	Individual CpG	SIC	AIBL	AD	No	OR for AD	-	0.958	0.0027569	Blood DNAm associated with Alzheimer's disease	Silva	2022	35982059
	cg22598233	chr19	633656	POLRMT (-61)	-0.22137	0.03449	1.37728e-10	-	Individual CpG	SIM	AIBL	AD	Yes, males	OR for AD	+	1.214	0.0050947	Blood DNAm associated with Alzheimerâ€™s disease in males	Silva	2022	36109771
	cg10690916	chr1	226567250	C1orf95 (+18452);ITPKB (+171912)	0.164049	0.034478	1.95453e-06	+	Individual CpG	SIM	ADNI + AIBL	AD	Yes, males	OR for AD (meta-analysis)	-	0.901	0.0086945	Blood DNAm associated with Alzheimerâ€™s disease in males	Silva	2022	36109771
	cg26766798	chr16	2196352	CASKIN1 (+172)	-0.218306	0.0466502	2.87367e-06	-	Individual CpG	ZTA	ADNI, AD	CSF total tau	No	estimate for methylation beta	+	0.134	0.0097191	Blood DNAm associated with CSF total tau	Zhang	2023	37038196
	cg15869128	chr19	49513150	FCGRT (+873)	-0.250484	0.0426155	4.1585e-09	-	Individual CpG	ZDH	FHS9	Dementia	No	hazard ratio for dementia risk	+	0.386	0.012986	Blood DNAm associated with dementia onset	Zhang	2025	40133250
	cg26210521	chr4	9893892	DRD5 (+112260);SLC2A9 (+127590)	0.286147	0.0378394	3.96484e-14	+	Individual CpG	ZTA	ADNI, CN	CSF total tau	No	estimate for methylation beta	-	-0.041	0.01506	Blood DNAm associated with CSF total tau	Zhang	2023	37038196
	cg26766798	chr16	2196352	CASKIN1 (+172)	-0.218306	0.0466502	2.87367e-06	-	Individual CpG	ZPT	ADNI, AD	CSF pTau	No	estimate for methylation beta	+	0.145	0.017242	Blood DNAm associated with CSF pTau	Zhang	2023	37038196
	cg20395881	chr10	1717020	ADARB2 (+20455);WDR37 (+663738)	0.150373	0.0321472	2.90198e-06	+	Individual CpG	SIM	AIBL	AD	Yes, males	OR for AD	-	0.942	0.021198	Blood DNAm associated with Alzheimerâ€™s disease in males	Silva	2022	36109771
	cg15869128	chr19	49513150	FCGRT (+873)	-0.250484	0.0426155	4.1585e-09	-	Individual CpG	ZDH	FHS9 + ADNI	Dementia	No	hazard ratio for dementia risk (meta-analysis)	+	0.314	0.021216	Blood DNAm associated with dementia onset	Zhang	2025	40133250
	cg03629778	chr7	130051484	ZC3HC1 (-35)	-0.139772	0.0261256	8.79546e-08	-	Individual CpG	ZDH	FHS9	Dementia	No	hazard ratio for dementia risk	+	0.42	0.021326	Blood DNAm associated with dementia onset	Zhang	2025	40133250
	cg03629778	chr7	130051484	ZC3HC1 (-35)	-0.139772	0.0261256	8.79546e-08	-	Individual CpG	SIM	ADNI + AIBL	AD	Yes, males	OR for AD (meta-analysis)	+	1.067	0.023623	Blood DNAm associated with Alzheimerâ€™s disease in males	Silva	2022	36109771
	cg05894355	chr1	50108563	ELAVL4 (+2273);DMRTA2 (+314936)	0.134237	0.0256751	1.71083e-07	+	Individual CpG	ZTA	ADNI, CN	CSF total tau	No	estimate for methylation beta	-	-0.017	0.025052	Blood DNAm associated with CSF total tau	Zhang	2023	37038196
	cg00188704	chr7	27101177	HOXA1 (-5205);HOXA2 (+1633)	0.379386	0.0788908	1.51681e-06	+	Individual CpG	ZTA	ADNI, AD	CSF total tau	No	estimate for methylation beta	-	-0.171	0.025297	Blood DNAm associated with CSF total tau	Zhang	2023	37038196
	cg10703676	chr9	114377743	AKNA (+16661);ORM2 (+47876)	0.104567	0.0218487	1.70174e-06	+	Individual CpG	SIF	ADNI	AD	Yes, females	OR for AD	-	0.873	0.02548	Blood DNAm associated with Alzheimerâ€™s disease in females	Silva	2022	36109771
	cg10992198	chr19	36061135	OVOL3 (-50067);WDR62 (+6200)	0.159976	0.0333964	1.66591e-06	+	Individual CpG	ZPT	ADNI, CN	CSF pTau	No	estimate for methylation beta	-	-0.038	0.027573	Blood DNAm associated with CSF pTau	Zhang	2023	37038196
	cg26210521	chr4	9893892	DRD5 (+112260);SLC2A9 (+127590)	0.286147	0.0378394	3.96484e-14	+	Individual CpG	ZPT	ADNI, CN	CSF pTau	No	estimate for methylation beta	-	-0.043	0.028016	Blood DNAm associated with CSF pTau	Zhang	2023	37038196
	cg07531550	chr4	189731440	FRG1 (-209348)	0.106619	0.0226997	2.64121e-06	+	Individual CpG	ZTA	ADNI, AD	CSF total tau	No	estimate for methylation beta	-	-0.013	0.028071	Blood DNAm associated with CSF total tau	Zhang	2023	37038196
	cg13956095	chr17	83079542	METRNL (-148)	-0.10073	0.0300451	0.000800466	-	CpG in DMR	SIM	AIBL	AD	Yes, males	OR for AD	+	1.155	0.028906	Blood DNAm associated with Alzheimerâ€™s disease in males	Silva	2022	36109771
	cg26270411	chr20	44885685	YWHAB (-25)	-0.143649	0.0296965	1.31667e-06	-	Individual CpG	ZTA	ADNI, AD	CSF total tau	No	estimate for methylation beta	+	0.108	0.029473	Blood DNAm associated with CSF total tau	Zhang	2023	37038196
	cg10992198	chr19	36061135	OVOL3 (-50067);WDR62 (+6200)	0.159976	0.0333964	1.66591e-06	+	Individual CpG	ZTA	ADNI, CN	CSF total tau	No	estimate for methylation beta	-	-0.033	0.029525	Blood DNAm associated with CSF total tau	Zhang	2023	37038196
	cg00188704	chr7	27101177	HOXA1 (-5205);HOXA2 (+1633)	0.379386	0.0788908	1.51681e-06	+	Individual CpG	ZPT	ADNI, AD	CSF pTau	No	estimate for methylation beta	-	-0.193	0.029802	Blood DNAm associated with CSF pTau	Zhang	2023	37038196
	cg20395881	chr10	1717020	ADARB2 (+20455);WDR37 (+663738)	0.150373	0.0321472	2.90198e-06	+	Individual CpG	ZTA	ADNI, CN	CSF total tau	No	estimate for methylation beta	-	-0.012	0.030145	Blood DNAm associated with CSF total tau	Zhang	2023	37038196
	cg08635130	chr1	32964848	RNF19B (-165)	-0.2095	0.0438131	1.73835e-06	-	Individual CpG	ZTA	ADNI, AD	CSF total tau	No	estimate for methylation beta	+	0.121	0.030428	Blood DNAm associated with CSF total tau	Zhang	2023	37038196
	cg13956095	chr17	83079542	METRNL (-148)	-0.10073	0.0300451	0.000800466	-	CpG in DMR	SIF	ADNI	AD	Yes, females	OR for AD	+	1.12	0.032073	Blood DNAm associated with Alzheimerâ€™s disease in females	Silva	2022	36109771
	cg19710238	chr2	382236	FAM150B (-93942);TMEM18 (+295202)	0.117581	0.0241883	1.16758e-06	+	Individual CpG	SIF	AIBL	AD	Yes, females	OR for AD	-	0.954	0.033819	Blood DNAm associated with Alzheimerâ€™s disease in females	Silva	2022	36109771
	cg07221855	chr4	185468310	CCDC110 (+3448);C4orf47 (+38922)	0.305569	0.0615273	6.82066e-07	+	Individual CpG	ZTA	ADNI, CN	CSF total tau	No	estimate for methylation beta	-	-0.039	0.034849	Blood DNAm associated with CSF total tau	Zhang	2023	37038196
	cg11708963	chr19	4639497	TNFAIP8L1 (-519)	-0.212614	0.0434376	9.84541e-07	-	Individual CpG	SIM	ADNI + AIBL	AD	Yes, males	OR for AD (meta-analysis)	+	1.354	0.034994	Blood DNAm associated with Alzheimerâ€™s disease in males	Silva	2022	36109771
	cg25623616	chr6	164827597	PDE10A (+834470)	0.130909	0.0430397	0.00235327	+	CpG in DMR	ZTA	ADNI, AD	CSF total tau	No	estimate for methylation beta	-	-0.042	0.035127	Blood DNAm associated with CSF total tau	Zhang	2023	37038196
	cg05894355	chr1	50108563	ELAVL4 (+2273);DMRTA2 (+314936)	0.134237	0.0256751	1.71083e-07	+	Individual CpG	ZPT	ADNI, CN	CSF pTau	No	estimate for methylation beta	-	-0.018	0.035813	Blood DNAm associated with CSF pTau	Zhang	2023	37038196
	cg03629778	chr7	130051484	ZC3HC1 (-35)	-0.139772	0.0261256	8.79546e-08	-	Individual CpG	ZDH	FHS9 + ADNI	Dementia	No	hazard ratio for dementia risk (meta-analysis)	+	0.315	0.035969	Blood DNAm associated with dementia onset	Zhang	2025	40133250
	cg07221855	chr4	185468310	CCDC110 (+3448);C4orf47 (+38922)	0.305569	0.0615273	6.82066e-07	+	Individual CpG	ZPT	ADNI, CN	CSF pTau	No	estimate for methylation beta	-	-0.044	0.036185	Blood DNAm associated with CSF pTau	Zhang	2023	37038196
	cg11708963	chr19	4639497	TNFAIP8L1 (-519)	-0.212614	0.0434376	9.84541e-07	-	Individual CpG	SIM	AIBL	AD	Yes, males	OR for AD	+	1.587	0.036983	Blood DNAm associated with Alzheimerâ€™s disease in males	Silva	2022	36109771
	cg01108434	chr8	81105175	ZNF704 (-230396);PAG1 (+6892)	0.304336	0.0591585	2.68349e-07	+	Individual CpG	SIM	AIBL	AD	Yes, males	OR for AD	-	0.9	0.037816	Blood DNAm associated with Alzheimerâ€™s disease in males	Silva	2022	36109771
	cg24440827	chr11	18456587	LDHAL6A (+705)	0.347814	0.0650165	8.81392e-08	+	Individual CpG	ZPT	ADNI, AD	CSF pTau	No	estimate for methylation beta	-	-0.225	0.038028	Blood DNAm associated with CSF pTau	Zhang	2023	37038196
	cg10509965	chr9	133100563	RALGDS (+20612);CEL (+38587)	0.124512	0.0258751	1.49388e-06	+	Individual CpG	SIM	AIBL	AD	Yes, males	OR for AD	-	0.906	0.039039	Blood DNAm associated with Alzheimerâ€™s disease in males	Silva	2022	36109771
	cg20396870	chr20	15039742	FLRT3 (-702136)	0.162785	0.0299398	5.41632e-08	+	Individual CpG	ZPT	ADNI, CN	CSF pTau	No	estimate for methylation beta	-	-0.031	0.039461	Blood DNAm associated with CSF pTau	Zhang	2023	37038196
	cg10509965	chr9	133100563	RALGDS (+20612);CEL (+38587)	0.124512	0.0258751	1.49388e-06	+	Individual CpG	SIM	ADNI + AIBL	AD	Yes, males	OR for AD (meta-analysis)	-	0.936	0.042034	Blood DNAm associated with Alzheimerâ€™s disease in males	Silva	2022	36109771
	cg25876882	chr15	24676636	SNRPN (-147010);NPAP1 (+1244)	0.213169	0.0431541	7.82325e-07	+	Individual CpG	SIM	AIBL	AD	Yes, males	OR for AD	-	0.937	0.042046	Blood DNAm associated with Alzheimerâ€™s disease in males	Silva	2022	36109771
	cg20422477	chr7	132079407	PODXL (-522802);PLXNA4 (+497893)	0.133831	0.0286834	3.07443e-06	+	Individual CpG	ZDH	ADNI	Dementia	No	hazard ratio for dementia risk	-	-0.28	0.043228	Blood DNAm associated with dementia onset	Zhang	2025	40133250
	cg10690916	chr1	226567250	C1orf95 (+18452);ITPKB (+171912)	0.164049	0.034478	1.95453e-06	+	Individual CpG	SIM	ADNI	AD	Yes, males	OR for AD	-	0.896	0.043402	Blood DNAm associated with Alzheimerâ€™s disease in males	Silva	2022	36109771
	cg20422477	chr7	132079407	PODXL (-522802);PLXNA4 (+497893)	0.133831	0.0286834	3.07443e-06	+	Individual CpG	ZTA	ADNI, AD	CSF total tau	No	estimate for methylation beta	-	-0.045	0.046565	Blood DNAm associated with CSF total tau	Zhang	2023	37038196
	cg08635130	chr1	32964848	RNF19B (-165)	-0.2095	0.0438131	1.73835e-06	-	Individual CpG	ZPT	ADNI, AD	CSF pTau	No	estimate for methylation beta	+	0.13	0.046759	Blood DNAm associated with CSF pTau	Zhang	2023	37038196
	cg07999939	chr11	48141563	OR4B1 (-75228);PTPRJ (+161004)	0.271191	0.0567144	1.73821e-06	+	Individual CpG	ZTA	ADNI, AD	CSF total tau	No	estimate for methylation beta	-	-0.082	0.04712	Blood DNAm associated with CSF total tau	Zhang	2023	37038196
	cg24440827	chr11	18456587	LDHAL6A (+705)	0.347814	0.0650165	8.81392e-08	+	Individual CpG	ZTA	ADNI, AD	CSF total tau	No	estimate for methylation beta	-	-0.185	0.048978	Blood DNAm associated with CSF total tau	Zhang	2023	37038196
	cg23184039	chr5	177950830	PROP1 (+45411);B4GALT7 (+350732)	0.154111	0.0270788	1.26126e-08	+	Individual CpG	SIM	ADNI + AIBL	AD	Yes, males	OR for AD (meta-analysis)	-	0.929	0.049415	Blood DNAm associated with Alzheimerâ€™s disease in males	Silva	2022	36109771
	cg01108434	chr8	81105175	ZNF704 (-230396);PAG1 (+6892)	0.304336	0.0591585	2.68349e-07	+	Individual CpG	ZDH	FHS9	Dementia	No	hazard ratio for dementia risk	-	-0.373	0.049452	Blood DNAm associated with dementia onset	Zhang	2025	40133250

## Sheet: S10
	Supplementary Table 10. Overlap between diet plus physical activity weight loss-associated DNAm signals in CENTRAL and dementia-related EWAS findings from the MIAMI-AD database. This table lists CpG–phenotype associations between DNAm signals identified from the diet plus physical activity intervention in CENTRAL and dementia-related EWAS findings curated in the MIAMI-AD database. CENTRAL DNAm si…
	CpG	Annotations			Analysis of CENTRAL dataset (diet + physical activity)					Alzheimer's disease analyses results from previous studies
		chr	position	GREAT_annotation	estimate	stdErr	pValue	Direction	Source	dataset	cohort	phenotype	sex_specific	statistics	direction	statistics_value	pValue	Description	Author	Year	PMID
	cg13421331	chr17	67697287	NOL11 (-20545);PITPNC1 (+319134)	0.140441	0.0216497	8.75643e-11	+	Individual CpG	SIM	ADNI	AD	Yes, males	OR for AD	-	0.962	0.00092581	Blood DNAm associated with Alzheimerâ€™s disease in males	Silva	2022	36109771
	cg01815730	chr10	24275322	KIAA1217 (+66160);ARHGAP21 (+448345)	0.131038	0.027622	2.09553e-06	+	Individual CpG	ZTA	ADNI, AD	CSF total tau	No	estimate for methylation beta	-	-0.082	0.0010174	Blood DNAm associated with CSF total tau	Zhang	2023	37038196
	cg25956820	chr1	220957420	HLX (+79065);DUSP10 (+784755)	0.12412	0.0261333	2.03924e-06	+	Individual CpG	ZTA	ADNI, CN	CSF total tau	No	estimate for methylation beta	-	-0.044	0.0011726	Blood DNAm associated with CSF total tau	Zhang	2023	37038196
	cg13421331	chr17	67697287	NOL11 (-20545);PITPNC1 (+319134)	0.140441	0.0216497	8.75643e-11	+	Individual CpG	SIC	ADNI	AD	No	OR for AD	-	0.979	0.0025432	Blood DNAm associated with Alzheimer's disease	Silva	2022	35982059
	cg01815730	chr10	24275322	KIAA1217 (+66160);ARHGAP21 (+448345)	0.131038	0.027622	2.09553e-06	+	Individual CpG	ZPT	ADNI, AD	CSF pTau	No	estimate for methylation beta	-	-0.087	0.0031697	Blood DNAm associated with CSF pTau	Zhang	2023	37038196
	cg09360295	chr17	21335930	KCNJ12 (-40266);MAP2K3 (+51260)	0.0732636	0.0156482	2.84213e-06	+	Individual CpG	SIC	AIBL	AD	No	OR for AD	-	0.931	0.0043676	Blood DNAm associated with Alzheimer's disease	Silva	2022	35982059
	cg25956820	chr1	220957420	HLX (+79065);DUSP10 (+784755)	0.12412	0.0261333	2.03924e-06	+	Individual CpG	ZPT	ADNI, CN	CSF pTau	No	estimate for methylation beta	-	-0.045	0.0045088	Blood DNAm associated with CSF pTau	Zhang	2023	37038196
	cg01277369	chr11	568374	PHRF1 (-8146);RASSF7 (+7324)	-0.153434	0.0297931	2.60495e-07	-	Individual CpG	SIM	ADNI + AIBL	AD	Yes, males	OR for AD (meta-analysis)	+	1.132	0.004767	Blood DNAm associated with Alzheimerâ€™s disease in males	Silva	2022	36109771
	cg13422535	chr22	46681784	CERK (+56476);GRAMD4 (+61384)	0.125112	0.0239498	1.75152e-07	+	Individual CpG	ZDH	ADNI	Dementia	No	hazard ratio for dementia risk	-	-0.618	0.0051274	Blood DNAm associated with dementia onset	Zhang	2025	40133250
	cg01333423	chr14	69486106	KIAA0247 (-125489);SLC39A9 (+87416)	0.255208	0.0538454	2.14096e-06	+	Individual CpG	ZDH	FHS9 + ADNI	Dementia	No	hazard ratio for dementia risk (meta-analysis)	-	-0.323	0.0054897	Blood DNAm associated with dementia onset	Zhang	2025	40133250
	cg08454858	chr7	22589598	IL6 (-136285);STEAP1B (-89102)	-0.490675	0.0981455	5.74884e-07	-	Individual CpG	ZAB	ADNI, CN	CSF amyloid beta	No	estimate for methylation beta	-	-0.087	0.0060364	Blood DNAm associated with CSF amyloid beta	Zhang	2023	37038196
	cg00047079	chr13	78614839	POU4F1 (-11303);RNF219 (+44339)	0.102172	0.0212236	1.47873e-06	+	Individual CpG	ZDH	ADNI	Dementia	No	hazard ratio for dementia risk	-	-0.559	0.0065719	Blood DNAm associated with dementia onset	Zhang	2025	40133250
	cg10690916	chr1	226567250	C1orf95 (+18452);ITPKB (+171912)	0.128481	0.0258123	6.44049e-07	+	Individual CpG	SIM	ADNI + AIBL	AD	Yes, males	OR for AD (meta-analysis)	-	0.901	0.0086945	Blood DNAm associated with Alzheimerâ€™s disease in males	Silva	2022	36109771
	cg13422535	chr22	46681784	CERK (+56476);GRAMD4 (+61384)	0.125112	0.0239498	1.75152e-07	+	Individual CpG	ZDH	FHS9 + ADNI	Dementia	No	hazard ratio for dementia risk (meta-analysis)	-	-0.382	0.008711	Blood DNAm associated with dementia onset	Zhang	2025	40133250
	cg00398767	chr5	109701321	MAN2A1 (+11957)	0.161804	0.0286508	1.62847e-08	+	Individual CpG	SIM	AIBL	AD	Yes, males	OR for AD	-	0.825	0.010965	Blood DNAm associated with Alzheimerâ€™s disease in males	Silva	2022	36109771
	cg01333423	chr14	69486106	KIAA0247 (-125489);SLC39A9 (+87416)	0.255208	0.0538454	2.14096e-06	+	Individual CpG	ZDH	FHS9	Dementia	No	hazard ratio for dementia risk	-	-0.345	0.011172	Blood DNAm associated with dementia onset	Zhang	2025	40133250
	cg13421331	chr17	67697287	NOL11 (-20545);PITPNC1 (+319134)	0.140441	0.0216497	8.75643e-11	+	Individual CpG	SIC	ADNI + AIBL	AD	No	OR for AD (meta-analysis)	-	0.989	0.011515	Blood DNAm associated with Alzheimer's disease	Silva	2022	35982059
	cg00398767	chr5	109701321	MAN2A1 (+11957)	0.161804	0.0286508	1.62847e-08	+	Individual CpG	SIM	ADNI + AIBL	AD	Yes, males	OR for AD (meta-analysis)	-	0.881	0.011619	Blood DNAm associated with Alzheimerâ€™s disease in males	Silva	2022	36109771
	cg01277369	chr11	568374	PHRF1 (-8146);RASSF7 (+7324)	-0.153434	0.0297931	2.60495e-07	-	Individual CpG	SIM	AIBL	AD	Yes, males	OR for AD	+	1.215	0.011732	Blood DNAm associated with Alzheimerâ€™s disease in males	Silva	2022	36109771
	cg16920991	chr12	100142566	ANKS1B (-158331);ACTR6 (-57520)	-0.147915	0.0300707	8.70328e-07	-	Individual CpG	ZDH	FHS9	Dementia	No	hazard ratio for dementia risk	+	0.323	0.01251	Blood DNAm associated with dementia onset	Zhang	2025	40133250
	cg07245558	chr1	246723211	SCCPDH (-835)	0.118752	0.0245345	1.29696e-06	+	Individual CpG	SIM	AIBL	AD	Yes, males	OR for AD	-	0.776	0.014082	Blood DNAm associated with Alzheimerâ€™s disease in males	Silva	2022	36109771
	cg26210521	chr4	9893892	DRD5 (+112260);SLC2A9 (+127590)	0.161752	0.0333959	1.27601e-06	+	Individual CpG	ZTA	ADNI, CN	CSF total tau	No	estimate for methylation beta	-	-0.041	0.01506	Blood DNAm associated with CSF total tau	Zhang	2023	37038196
	cg09274347	chr14	103133214	EIF5 (-200787);TNFAIP2 (+9755)	0.157967	0.0289381	4.79415e-08	+	Individual CpG	SIM	ADNI + AIBL	AD	Yes, males	OR for AD (meta-analysis)	-	0.881	0.017454	Blood DNAm associated with Alzheimerâ€™s disease in males	Silva	2022	36109771
	cg23051598	chr16	28823245	ATXN2L (+154)	-0.145697	0.0447117	0.00111969	-	CpG in DMR	SIF	ADNI	AD	Yes, females	OR for AD	+	1.073	0.017461	Blood DNAm associated with Alzheimerâ€™s disease in females	Silva	2022	36109771
	cg09360295	chr17	21335930	KCNJ12 (-40266);MAP2K3 (+51260)	0.0732636	0.0156482	2.84213e-06	+	Individual CpG	SIF	AIBL	AD	Yes, females	OR for AD	-	0.911	0.018249	Blood DNAm associated with Alzheimerâ€™s disease in females	Silva	2022	36109771
	cg09554443	chr1	167518524	CD247 (+13)	0.109899	0.0210087	1.68462e-07	+	Individual CpG	ZAB	ADNI, CN	CSF amyloid beta	No	estimate for methylation beta	+	0.035	0.018419	Blood DNAm associated with CSF amyloid beta	Zhang	2023	37038196
	cg25614450	chr21	32043392	HUNK (+170079);MIS18A (+235674)	0.101262	0.0206734	9.6735e-07	+	Individual CpG	SIM	AIBL	AD	Yes, males	OR for AD	-	0.843	0.020821	Blood DNAm associated with Alzheimerâ€™s disease in males	Silva	2022	36109771
	cg25614450	chr21	32043392	HUNK (+170079);MIS18A (+235674)	0.101262	0.0206734	9.6735e-07	+	Individual CpG	ZTA	ADNI, CN	CSF total tau	No	estimate for methylation beta	-	-0.033	0.022204	Blood DNAm associated with CSF total tau	Zhang	2023	37038196
	cg14922317	chr16	28823249	ATXN2L (+158)	-0.174651	0.043452	5.8346e-05	-	CpG in DMR	ZPT	ADNI, CN	CSF pTau	No	estimate for methylation beta	+	0.02	0.022984	Blood DNAm associated with CSF pTau	Zhang	2023	37038196
	cg16841327	chr22	46070302	WNT7B (-93175);PPARA (-80316)	-0.10484	0.0207974	4.63129e-07	-	Individual CpG	ZPT	ADNI, CN	CSF pTau	No	estimate for methylation beta	+	0.036	0.023464	Blood DNAm associated with CSF pTau	Zhang	2023	37038196
	cg00047079	chr13	78614839	POU4F1 (-11303);RNF219 (+44339)	0.102172	0.0212236	1.47873e-06	+	Individual CpG	SIF	ADNI	AD	Yes, females	OR for AD	-	0.933	0.023911	Blood DNAm associated with Alzheimerâ€™s disease in females	Silva	2022	36109771
	cg12120973	chr1	1280544	SCNN1D (+110)	0.210497	0.0445671	2.3223e-06	+	Individual CpG	ZDH	FHS9 + ADNI	Dementia	No	hazard ratio for dementia risk (meta-analysis)	-	-0.33	0.024512	Blood DNAm associated with dementia onset	Zhang	2025	40133250
	cg01277369	chr11	568374	PHRF1 (-8146);RASSF7 (+7324)	-0.153434	0.0297931	2.60495e-07	-	Individual CpG	SIC	ADNI	AD	No	OR for AD	+	1.086	0.025489	Blood DNAm associated with Alzheimer's disease	Silva	2022	35982059
	cg21128206	chr9	68795028	FAM122A (+14982);PRKACG (+219094)	-0.512323	0.106987	1.67911e-06	-	Individual CpG	SIF	ADNI + AIBL	AD	Yes, females	OR for AD (meta-analysis)	+	1.179	0.025517	Blood DNAm associated with Alzheimerâ€™s disease in females	Silva	2022	36109771
	cg21128206	chr9	68795028	FAM122A (+14982);PRKACG (+219094)	-0.512323	0.106987	1.67911e-06	-	Individual CpG	SIF	AIBL	AD	Yes, females	OR for AD	+	1.267	0.026599	Blood DNAm associated with Alzheimerâ€™s disease in females	Silva	2022	36109771
	cg10992198	chr19	36061135	OVOL3 (-50067);WDR62 (+6200)	0.144565	0.0219068	4.13747e-11	+	Individual CpG	ZPT	ADNI, CN	CSF pTau	No	estimate for methylation beta	-	-0.038	0.027573	Blood DNAm associated with CSF pTau	Zhang	2023	37038196
	cg26210521	chr4	9893892	DRD5 (+112260);SLC2A9 (+127590)	0.161752	0.0333959	1.27601e-06	+	Individual CpG	ZPT	ADNI, CN	CSF pTau	No	estimate for methylation beta	-	-0.043	0.028016	Blood DNAm associated with CSF pTau	Zhang	2023	37038196
	cg25614450	chr21	32043392	HUNK (+170079);MIS18A (+235674)	0.101262	0.0206734	9.6735e-07	+	Individual CpG	ZPT	ADNI, CN	CSF pTau	No	estimate for methylation beta	-	-0.036	0.028976	Blood DNAm associated with CSF pTau	Zhang	2023	37038196
	cg09360295	chr17	21335930	KCNJ12 (-40266);MAP2K3 (+51260)	0.0732636	0.0156482	2.84213e-06	+	Individual CpG	SIF	ADNI + AIBL	AD	Yes, females	OR for AD (meta-analysis)	-	0.946	0.029233	Blood DNAm associated with Alzheimerâ€™s disease in females	Silva	2022	36109771
	cg10992198	chr19	36061135	OVOL3 (-50067);WDR62 (+6200)	0.144565	0.0219068	4.13747e-11	+	Individual CpG	ZTA	ADNI, CN	CSF total tau	No	estimate for methylation beta	-	-0.033	0.029525	Blood DNAm associated with CSF total tau	Zhang	2023	37038196
	cg16920991	chr12	100142566	ANKS1B (-158331);ACTR6 (-57520)	-0.147915	0.0300707	8.70328e-07	-	Individual CpG	ZDH	FHS9 + ADNI	Dementia	No	hazard ratio for dementia risk (meta-analysis)	+	0.256	0.029785	Blood DNAm associated with dementia onset	Zhang	2025	40133250
	cg12838928	chr16	16018739	ABCC1 (+69164);ABCC6 (+204724)	0.0909418	0.0194387	2.89145e-06	+	Individual CpG	ZTA	ADNI, AD	CSF total tau	No	estimate for methylation beta	-	-0.066	0.036216	Blood DNAm associated with CSF total tau	Zhang	2023	37038196
	cg13421331	chr17	67697287	NOL11 (-20545);PITPNC1 (+319134)	0.140441	0.0216497	8.75643e-11	+	Individual CpG	SIM	ADNI + AIBL	AD	Yes, males	OR for AD (meta-analysis)	-	0.986	0.038881	Blood DNAm associated with Alzheimerâ€™s disease in males	Silva	2022	36109771
	cg10509965	chr9	133100563	RALGDS (+20612);CEL (+38587)	0.12582	0.0216169	5.86893e-09	+	Individual CpG	SIM	AIBL	AD	Yes, males	OR for AD	-	0.906	0.039039	Blood DNAm associated with Alzheimerâ€™s disease in males	Silva	2022	36109771
	cg10509965	chr9	133100563	RALGDS (+20612);CEL (+38587)	0.12582	0.0216169	5.86893e-09	+	Individual CpG	SIM	ADNI + AIBL	AD	Yes, males	OR for AD (meta-analysis)	-	0.936	0.042034	Blood DNAm associated with Alzheimerâ€™s disease in males	Silva	2022	36109771
	cg12488895	chr1	203348784	FMOD (+2704);BTG2 (+43250)	0.247718	0.0519543	1.86066e-06	+	Individual CpG	SIF	AIBL	AD	Yes, females	OR for AD	-	0.787	0.042221	Blood DNAm associated with Alzheimerâ€™s disease in females	Silva	2022	36109771
	cg12120973	chr1	1280544	SCNN1D (+110)	0.210497	0.0445671	2.3223e-06	+	Individual CpG	ZDH	FHS9	Dementia	No	hazard ratio for dementia risk	-	-0.358	0.042369	Blood DNAm associated with dementia onset	Zhang	2025	40133250
	cg10690916	chr1	226567250	C1orf95 (+18452);ITPKB (+171912)	0.128481	0.0258123	6.44049e-07	+	Individual CpG	SIM	ADNI	AD	Yes, males	OR for AD	-	0.896	0.043402	Blood DNAm associated with Alzheimerâ€™s disease in males	Silva	2022	36109771
	cg18153499	chr19	46639201	GNG8 (-4518)	-0.130261	0.0278916	3.008e-06	-	Individual CpG	SIF	ADNI	AD	Yes, females	OR for AD	+	1.085	0.043456	Blood DNAm associated with Alzheimerâ€™s disease in females	Silva	2022	36109771
	cg14922317	chr16	28823249	ATXN2L (+158)	-0.174651	0.043452	5.8346e-05	-	CpG in DMR	ZTA	ADNI, CN	CSF total tau	No	estimate for methylation beta	+	0.015	0.045779	Blood DNAm associated with CSF total tau	Zhang	2023	37038196
	cg16841327	chr22	46070302	WNT7B (-93175);PPARA (-80316)	-0.10484	0.0207974	4.63129e-07	-	Individual CpG	ZTA	ADNI, CN	CSF total tau	No	estimate for methylation beta	+	0.028	0.047087	Blood DNAm associated with CSF total tau	Zhang	2023	37038196
	cg04195161	chr17	38457459	ARHGAP23 (+29043);SRCIN1 (+148479)	0.122302	0.0231866	1.32996e-07	+	Individual CpG	ZDH	FHS9	Dementia	No	hazard ratio for dementia risk	-	-0.388	0.04838	Blood DNAm associated with dementia onset	Zhang	2025	40133250
	cg09274347	chr14	103133214	EIF5 (-200787);TNFAIP2 (+9755)	0.157967	0.0289381	4.79415e-08	+	Individual CpG	SIM	ADNI	AD	Yes, males	OR for AD	-	0.872	0.048823	Blood DNAm associated with Alzheimerâ€™s disease in males	Silva	2022	36109771
	cg09360295	chr17	21335930	KCNJ12 (-40266);MAP2K3 (+51260)	0.0732636	0.0156482	2.84213e-06	+	Individual CpG	SIC	ADNI + AIBL	AD	No	OR for AD (meta-analysis)	-	0.969	0.049257	Blood DNAm associated with Alzheimer's disease	Silva	2022	35982059
	cg02379870	chr8	22553685	PDLIM2 (-25055);SORBS3 (+1992)	0.127931	0.0251477	3.63452e-07	+	Individual CpG	ZPT	ADNI, AD	CSF pTau	No	estimate for methylation beta	-	-0.07	0.049814	Blood DNAm associated with CSF pTau	Zhang	2023	37038196

[truncated: 2 more sheets: S11, S12]
